# Supplementary material
Source: PubMed Central journal article supplement (PMC6366850)

| <b>Contents</b>                                                                                                                     | <b>Page Number</b> |
|-------------------------------------------------------------------------------------------------------------------------------------|--------------------|
| Table S1. NMR spectral data for loggerpeptin A ( <b>1</b> ) at 600 MHz ( $^1\text{H}$ ), 150 MHz ( $^{13}\text{C}$ ) in DMSO- $d_6$ | S3                 |
| Table S2. NMR spectral data for loggerpeptin B ( <b>2</b> ) at 600 MHz ( $^1\text{H}$ ), 150 MHz ( $^{13}\text{C}$ ) in DMSO- $d_6$ | S5                 |
| Table S3. NMR spectral data for loggerpeptin C ( <b>3</b> ) at 600 MHz ( $^1\text{H}$ ), 150 MHz ( $^{13}\text{C}$ ) in DMSO- $d_6$ | S7                 |
| Table S4. NMR spectral data for molassamide ( <b>4</b> ) at 600 MHz ( $^1\text{H}$ ), 150 MHz ( $^{13}\text{C}$ ) in DMSO- $d_6$    | S9                 |
| Figure S1. Progress curves of HNE treated with loggerpeptins, molassamide, and sivelestat                                           | S11                |
| Figure S2. The expression levels of NE and CD40 in a panel of breast cancer cell lines                                              | S12                |
| Figure S3. The effects of HNE and molassamide ( <b>4</b> ) on cell viability                                                        | S13                |
| Figure S4. The effect of HNE on expression levels of NF $\kappa$ B target genes in MDA-MB-231 cells                                 | S14                |
| Figure S5. The effect of molassamide ( <b>4</b> ) on HNE-induced morphological changes in MDA-MB-231 cells                          | S15                |
| Figure S6. The effect of molassamide ( <b>4</b> ) on the chymotrypsin-like activity of proteasomes                                  | S16                |
| $^1\text{H}$ NMR Spectrum of Loggerpeptin A ( <b>1</b> ) in DMSO- $d_6$                                                             | S17                |
| COSY Spectrum of Loggerpeptin A ( <b>1</b> ) in DMSO- $d_6$                                                                         | S18                |
| TOCSY Spectrum of Loggerpeptin A ( <b>1</b> ) in DMSO- $d_6$                                                                        | S19                |
| HSQC Spectrum of Loggerpeptin A ( <b>1</b> ) in DMSO- $d_6$                                                                         | S20                |
| HMBC Spectrum of Loggerpeptin A ( <b>1</b> ) in DMSO- $d_6$                                                                         | S21                |
| ROESY Spectrum of Loggerpeptin A ( <b>1</b> ) in DMSO- $d_6$                                                                        | S22                |
| $^1\text{H}$ NMR Spectrum of Loggerpeptin B ( <b>2</b> ) in DMSO- $d_6$                                                             | S23                |
| COSY Spectrum of Loggerpeptin B ( <b>2</b> ) in DMSO- $d_6$                                                                         | S24                |
| TOCSY Spectrum of Loggerpeptin B ( <b>2</b> ) in DMSO- $d_6$                                                                        | S25                |

|                                                                                           |     |
|-------------------------------------------------------------------------------------------|-----|
| HSQC Spectrum of Loggerpeptin B ( <b>2</b> ) in DMSO- <i>d</i> <sub>6</sub>               | S26 |
| HMBC Spectrum of Loggerpeptin B ( <b>2</b> ) in DMSO- <i>d</i> <sub>6</sub>               | S27 |
| ROESY Spectrum of Loggerpeptin B ( <b>2</b> ) in DMSO- <i>d</i> <sub>6</sub>              | S28 |
| <sup>1</sup> H NMR Spectrum of Loggerpeptin C ( <b>3</b> ) in DMSO- <i>d</i> <sub>6</sub> | S29 |
| COSY Spectrum of Loggerpeptin C ( <b>3</b> ) in DMSO- <i>d</i> <sub>6</sub>               | S30 |
| HSQC Spectrum of Loggerpeptin C ( <b>3</b> ) in DMSO- <i>d</i> <sub>6</sub>               | S31 |
| HMBC Spectrum of Loggerpeptin C ( <b>3</b> ) in DMSO- <i>d</i> <sub>6</sub>               | S32 |
| ROESY Spectrum of Loggerpeptin C ( <b>3</b> ) in DMSO- <i>d</i> <sub>6</sub>              | S33 |
| <sup>1</sup> H NMR Spectrum of Molassamide ( <b>4</b> ) in DMSO- <i>d</i> <sub>6</sub>    | S34 |
| COSY Spectrum of Molassamide ( <b>4</b> ) in DMSO- <i>d</i> <sub>6</sub>                  | S35 |
| HSQC Spectrum of Molassamide ( <b>4</b> ) in DMSO- <i>d</i> <sub>6</sub>                  | S36 |
| HMBC Spectrum of Molassamide ( <b>4</b> ) in DMSO- <i>d</i> <sub>6</sub>                  | S37 |
| ROESY Spectrum of Molassamide ( <b>4</b> ) in DMSO- <i>d</i> <sub>6</sub>                 | S38 |

**Table S1.** NMR spectral data for loggerpeptin A (**1**) at 600 MHz (<sup>1</sup>H), 150 MHz (<sup>13</sup>C) in DMSO-*d*<sub>6</sub>

| C/H no. | $\delta_{\text{H}}$ (J in Hz) | $\delta_{\text{C}}^{\text{a}}$ | <sup>1</sup> H- <sup>1</sup> H COSY | HMBC <sup>b</sup>                          | ROESY                                             |                                                                            |
|---------|-------------------------------|--------------------------------|-------------------------------------|--------------------------------------------|---------------------------------------------------|----------------------------------------------------------------------------|
| Val     | 1                             | 173.5, s                       |                                     |                                            |                                                   |                                                                            |
|         | 2                             | 4.63, dd (9.5, 4.5)            | 56.2, d                             | H-3, NH                                    | 1 (Tyr), 3, 4, 5                                  | H-3, H <sub>3</sub> -4, H <sub>3</sub> -5, H <sub>3</sub> -3 (Ala), NH     |
|         | 3                             | 2.02, m                        | 31.2, d                             | H-2, H <sub>3</sub> -4, H <sub>3</sub> -5  | 4, 5                                              | H-2, H <sub>3</sub> -4, H <sub>3</sub> -5                                  |
|         | 4                             | 0.68, d (6.5)                  | 17.5, q                             | H-3                                        | 2, 3, 5                                           | H <sub>3</sub> -4, NH                                                      |
|         | 5                             | 0.82, d (6.2)                  | 19.6, q                             | H-3                                        | 2, 3, 4                                           | H-2, H-3, N-Me (Tyr),                                                      |
|         | NH                            | 7.4, d (9.4)                   |                                     | H-2                                        | 2                                                 | H-2, H-3, H <sub>3</sub> -4, H <sub>3</sub> -5, H-2 (Tyr), N-Me (Tyr)      |
|         | N-Me-Tyr                      | 1                              | 172.2, s                            |                                            |                                                   |                                                                            |
| 2       |                               | 4.86, dd (11.7, 1.5)           | 61.3, d                             | H-3a, H-3b                                 |                                                   | H-3a, H-3b, H-3b (Phe), H-2 (Phe), H-5/9, H-5/9 (Phe), NH (Val)            |
| 3a      |                               | 3.07, dd (-13.3, 5.5)          | 33.1, t                             | H-2, H-3b                                  | 5/9                                               | H-2, H-2 (Phe), H-5/9                                                      |
| 3b      |                               | 2.66, dd (-14.0, 10.0)         |                                     | H-2, H-3a                                  | 2, 5/9                                            | H-2, H-5/9                                                                 |
| 4       |                               |                                | 127.8, s                            |                                            |                                                   |                                                                            |
| 5/9     |                               | 6.96, d (8.3)                  | 131.2, d                            | H-6/8                                      | 3, 5/9, 7                                         | H-2, H-3a, H-3b, N-Me, H-6/8, H-2 (Phe)                                    |
| 6/8     |                               | 6.74, d (8.3)                  | 115.7, d                            | H-5/9                                      | 4, 6/8, 7                                         | H-5/9, H-3b (Phe)                                                          |
| 7       |                               |                                | 156.8, s                            |                                            |                                                   |                                                                            |
| 7-OH    |                               |                                |                                     |                                            |                                                   |                                                                            |
| N-Me    |                               | 2.72, s                        | 30.7, q                             |                                            | 2, 1 (Phe)                                        | H-2, H-2 (Val), H-2 (Phe), H-6 (Ahp), H-5/9, NH (Val)                      |
| Phe     |                               | 1                              | 170.9, s                            |                                            |                                                   |                                                                            |
|         | 2                             | 4.69, dd (11.4, 3.8)           | 50.5, d                             | H-3a, H-3b                                 | 2 (Ahp)                                           | H-3a, H-3b, H-3a (Tyr), H-2 (Tyr), H-6 (Ahp), H-5/9, H-5/9 (Tyr), NH (Val) |
|         | 3a                            | 2.82, dd (-15.2, 12.2)         | 35.3, t                             | H-2, H-3b                                  | 5/9                                               | H-2, H-3b, H-6 (Ahp), H-5/9                                                |
|         | 3b                            | 1.74, dd (-15.2, 3.1)          |                                     | H-2, H-3a                                  |                                                   | H-2, H-3a, H-2 (Tyr), H-6 (Ahp), H-5/9                                     |
|         | 4                             |                                | 137.2, s                            |                                            |                                                   |                                                                            |
|         | 5/9                           | 6.79, d (7.3)                  | 130.1, d                            | H-6/8                                      | 3, 5/9, 7                                         | H-2, H-3a, H-3b, H-4b (Ahp), H-3 (Ahp), H-2 (Tyr), H-6 (Ahp), H-6/8        |
|         | 6/8                           | 7.13, d (7.3)                  | 128.3, d                            | H-5/9                                      | 4, 6/8                                            | H-5/9                                                                      |
|         | 7                             | 7.10, m                        | 126.6, d                            |                                            | 5/9                                               | H-5/9                                                                      |
| Ahp     | 2                             |                                | 170.26, s                           |                                            |                                                   |                                                                            |
|         | 3                             | 3.58, m                        | 48.9, d                             | H-4a, H-4b, NH                             |                                                   | H-4b, H-5/9 (Phe), H-6/8 (Phe), NH                                         |
|         | 4a                            | 2.36, m                        | 21.9, t                             | H-3, H-4b                                  |                                                   | H-4b, H-5a, H-3 (Thr-1), NH                                                |
|         | 4b                            | 1.53, m                        |                                     | H-3, H-4a, H-5a                            |                                                   | H-3, H-4b, NH                                                              |
|         | 5a                            | 1.64, m                        | 29.6, t                             | H-4b, H-5a, H-6                            |                                                   | H-4a, H-4b, H-6                                                            |
|         | 5b                            | 1.51, m                        |                                     | H-5a, H-6                                  |                                                   | H-5a, H-6, H-5/9 (Phe)                                                     |
|         | 6                             | 5.02, br s                     | 74.1, d                             | H-5a, H-5b                                 |                                                   | H-4b, H-5a, H-5b, H-3a (Phe), H-3b (Phe),                                  |
|         | 6-OH                          |                                |                                     |                                            |                                                   |                                                                            |
| NH      | 7.03, d (9.0)                 |                                | H-3                                 | 1 (Leu)                                    | H-3, H-4a, H-4b, H-2 (Leu), H-3 (Thr-1), NH (Leu) |                                                                            |
| Leu     | 1                             |                                | 171.0, s                            |                                            |                                                   |                                                                            |
|         | 2                             | 4.16, m                        | 50.7, d                             | H-3a, H-3b, NH                             |                                                   | H <sub>3</sub> -5, H-3a, H-4, NH (Ahp), NH                                 |
|         | 3a                            | 1.64, m                        | 39.3, t                             | H-2, H-4                                   |                                                   | H-2, H-3b, H <sub>3</sub> -5, H <sub>3</sub> -6                            |
|         | 3b                            | 1.26, m                        |                                     | H-2                                        |                                                   | H-3a, H <sub>3</sub> -6, NH                                                |
|         | 4                             | 1.39, m                        | 24.3, d                             | H-3a, H <sub>3</sub> -5, H <sub>3</sub> -6 |                                                   | H <sub>3</sub> -5, H <sub>3</sub> -6, NH                                   |
|         | 5                             | 0.68, d (6.8)                  | 21.2, q                             | H-4                                        | 3, 6                                              | H-2, H-3a, H-4                                                             |
|         | 6                             | 0.79, d (6.8)                  | 23.6, q                             | H-4                                        | 3, 4, 5                                           | H-4                                                                        |

**Table S1. Continued**

| C/H no. | $\delta_{\text{H}}$ (J in Hz) | $\delta_{\text{C}}^{\text{a}}$ | $^1\text{H}-^1\text{H}$ COSY         | HMBC <sup>b</sup> | ROESY                                                                                   |
|---------|-------------------------------|--------------------------------|--------------------------------------|-------------------|-----------------------------------------------------------------------------------------|
|         | NH 8.37, d (8.5)              |                                | H-2                                  |                   | H-2, H-3b, H-4, H-2 (Thr-1), H-3 (Thr-1), NH (Ahp)                                      |
| Thr-1   | 1                             | 169.3, s                       |                                      |                   |                                                                                         |
|         | 2 4.55, d (9.4)               | 55.1, d                        | NH                                   | 1 (Val)           | H-3, H-4 (Leu), H <sub>3</sub> -4, NH, NH (Leu)                                         |
|         | 3 5.35, br q (6.6)            | 72.2, d                        | H <sub>3</sub> -4                    | 1 (Val), 4        | H-2, H <sub>3</sub> -5 (Val), H <sub>3</sub> -4, H-2 (Val), NH (Ahp), NH (Leu)          |
|         | 4 1.15, d (6.6)               | 18.1, q                        | H-3                                  | 2, 3              | H-2, H-3, NH                                                                            |
|         | NH 7.70, d (9.0)              |                                | H-2                                  | 1 (Thr-2)         | H-2, H <sub>3</sub> -4, H-2 (Thr-2), H-3 (Thr-2), H <sub>3</sub> -4 (Thr-2), NH (Thr-2) |
| Thr-2   | 1                             | 171.1, s                       |                                      |                   |                                                                                         |
|         | 2 4.31, dd (8.4, 4.2)         | 58.1, d                        | H-3, NH                              | 1                 | H-3, H <sub>3</sub> -4, NH (Thr-1), NH                                                  |
|         | 3 3.95, m                     | 66.8, d                        | H-2, H <sub>3</sub> -4               | 1                 | H-2, H <sub>3</sub> -4, NH (Thr-1), NH                                                  |
|         | 4 0.97, d (6.3)               | 19.4, q                        | H-3                                  | 2, 3              | H-2, H-3, NH                                                                            |
|         | OH                            |                                |                                      |                   |                                                                                         |
|         | NH 7.81, br                   |                                | H-2                                  | 1 (Ala)           | H-3, H <sub>3</sub> -4, H-2 (Ala), H <sub>3</sub> -3 (Ala)                              |
| Ala     | 1                             | 173.3, s                       |                                      |                   |                                                                                         |
|         | 2 4.35, m                     | 48.4, d                        | H <sub>3</sub> -3, NH                | 1, 3              | H <sub>3</sub> -3, NH (Thr-2), NH                                                       |
|         | 3 1.18, d (7.2)               | 18.4, q                        | H-2                                  | 1, 2              | H-2, NH                                                                                 |
|         | NH 8.01, d (7.4)              |                                | H-2                                  | 1 (Ba)            | H-2, H <sub>3</sub> -3, H-2 (Ba)                                                        |
| Ba      | 1                             | 172.3, s                       |                                      |                   |                                                                                         |
|         | 2 2.04, m (2H)                | 37.4, t                        | H <sub>2</sub> -3                    | 1, 3, 4           | H-3, NH (Ala)                                                                           |
|         | 3 1.46, m (2H)                | 18.9, t                        | H <sub>2</sub> -2, H <sub>3</sub> -4 | 1, 2, 4           | H-2, H <sub>3</sub> -4                                                                  |
|         | 4 0.81, t (7.5)               | 13.9, q                        | H <sub>2</sub> -3                    | 2                 | H-2, H-3                                                                                |

<sup>a</sup>Multiplicity derived from HSQC spectrum. <sup>b</sup>Protons showing long-range correlation with indicated carbon.

**Table S2.** NMR spectral data for loggerpeptin B (**2**) at 600 MHz ( $^1\text{H}$ ), 150 MHz ( $^{13}\text{C}$ ) in  $\text{DMSO-}d_6$ 

| C/H no.  | $\delta_{\text{H}}$ (J in Hz) | $\delta_{\text{C}}^a$ | $^1\text{H-}^1\text{H}$ COSY | HMBC <sup>b</sup>                          | ROESY      |                                                           |
|----------|-------------------------------|-----------------------|------------------------------|--------------------------------------------|------------|-----------------------------------------------------------|
| Val      | 1                             | 169.5, s              |                              |                                            |            |                                                           |
|          | 2                             | 4.66, dd (9.9, 4.7)   | 55.8, d                      | H-3, NH                                    | 1, 3, 4, 5 | H-3, H <sub>3</sub> -5, NH                                |
|          | 3                             | 2.06, m               | 30.8, d                      | H-2, H <sub>3</sub> -4, H <sub>3</sub> -5  |            | H-2, H <sub>3</sub> -4, H <sub>3</sub> -5                 |
|          | 4                             | 0.72, d (6.5)         | 17.3, q                      | H-3                                        | 2, 3, 5    | H-3, NH                                                   |
|          | 5                             | 0.86, d (6.2)         | 19.3, q                      | H-3                                        | 2, 3, 4    | H-2, NH, N-Me (Tyr)                                       |
|          | NH                            | 7.43, d (9.6)         |                              | H-2                                        | 1          | H-1, H <sub>3</sub> -4, H-2 (Tyr), N-Me (Tyr)             |
| N-Me-Tyr | 1                             | 170.9, s              |                              |                                            |            |                                                           |
|          | 2                             | 4.90, dd (11.7, 1.8)  | 60.8, d                      | H-3a, H-3b                                 |            | H-2 (Phe), H-5/9, NH (Val)                                |
|          | 3a                            | 3.12, dd (-14.6, 1.5) | 32.9, t                      | H-2, H-3b                                  | 5/9        | H-2, H-3b, H-5/9                                          |
|          | 3b                            | 2.71, m               |                              | H-2, H-3a                                  | 1, 2, 5/9  | H-3a                                                      |
|          | 4                             |                       | 127.8, s                     |                                            |            |                                                           |
|          | 5/9                           | 7.00, d (8.3)         | 130.3, d                     | H-6/8                                      | 3, 5/9, 7  | H-2, H-3a, H-3b, H-6/8, N-Me, H-2 (Phe)                   |
|          | 6/8                           | 6.78, d (8.3)         | 115.3, d                     | H-5/9                                      | 4          | H-5/9                                                     |
|          | 7                             |                       | 156.8, s                     |                                            |            |                                                           |
|          | 7-OH                          |                       |                              |                                            |            |                                                           |
|          | N-Me                          | 2.76, s               | 30.4, q                      |                                            | 2, 1 (Phe) | H-5/9, H <sub>3</sub> -4, H <sub>3</sub> -5, NH (Val)     |
| Phe      | 1                             | 170.5, s              |                              |                                            |            |                                                           |
|          | 2                             | 4.75, dd (11.4, 4.0)  | 50.2, d                      | H-3a, H-3b                                 |            | H-3a, H-3b                                                |
|          | 3a                            | 2.87, m               | 35.4, t                      | H-2, H-3b                                  | 5/9        | H-3b, H-5,9, H-6 (Ahp)                                    |
|          | 3b                            | 1.79, m               |                              | H-2, H-3a                                  |            | H-2, H-3a, H-6 (Ahp)                                      |
|          | 4                             |                       | 137.2, s                     |                                            |            |                                                           |
|          | 5/9                           | 6.83, d (7.3)         | 129.4, d                     | H-6/8                                      | 3, 7, 5/9  | H-2, H-3a, H-3b, H-6/8, H-6 (Ahp),                        |
|          | 6/8                           | 7.17, d (7.3)         | 127.7, d                     | H-5/9                                      | 4, 6/8     | H-5/9                                                     |
|          | 7                             | 7.15, m               | 126.1, d                     |                                            | 5/9        | H-5/9                                                     |
| Ahp      | 2                             |                       | 170.5, s                     |                                            |            |                                                           |
|          | 3                             | 3.63, m               | 48.7, d                      | H-4a, H-4b, NH                             | 1 (Leu)    | H-4b, NH                                                  |
|          | 4a                            | 2.40, m               | 21.6, t                      | H-3, H-4b, H-5a, H-5b                      |            | H-4b, H-5a, NH                                            |
|          | 4b                            | 1.58, m               |                              | H-4a, H-5a                                 | 1 (Leu)    | H-3, H-4a, H-6                                            |
|          | 5a                            | 1.68, m               | 29.4, t                      | H-4b, H-5b, H-6                            |            | H-4a, H-6                                                 |
|          | 5b                            | 1.57, m               |                              | H-5a, H-6                                  |            | H-6                                                       |
|          | 6                             | 5.06, br s            | 73.7, d                      | H-5a, H-5b                                 |            | H-5a, H-5b, H-3a (Phe), H-3b (Phe), H-5/9 (Phe)           |
|          | 6-OH                          |                       |                              |                                            |            |                                                           |
|          | NH                            | 7.07, d (9.0)         |                              | H-3                                        | 2          | H-3, H-4a, H-2 (Leu), H-3 (Thr-1), NH (Leu)               |
|          | Leu                           | 1                     |                              | 173.9, s                                   |            |                                                           |
| 2        |                               | 4.19, m               | 50.4, d                      | H-3a, H-3b, NH                             |            | H-3a, H-3b, H-4, H <sub>3</sub> -5, H <sub>3</sub> -6, NH |
| 3a       |                               | 1.69, m               | 39.1, t                      | H-3b, H-4                                  |            | H-2, H-3b, H-4                                            |
| 3b       |                               | 1.31, m               |                              | H-2, H-3a                                  |            | H-3a, NH, NH (Ala)                                        |
| 4        |                               | 1.43, m               | 24.1, d                      | H-3a, H <sub>3</sub> -5, H <sub>3</sub> -6 |            | H <sub>3</sub> -5, H <sub>3</sub> -6, NH                  |
| 5        |                               | 0.72, d (6.5)         | 20.9, q                      | H-4                                        | 3, 6       | H-2, H-3a, H-4                                            |

**Table S2. Continued**

| C/H no. | $\delta_{\text{H}}$ (J in Hz) | $\delta_{\text{C}}^{\text{a}}$ | $^1\text{H}-^1\text{H}$ COSY                      | HMBC <sup>b</sup> | ROESY                                  |
|---------|-------------------------------|--------------------------------|---------------------------------------------------|-------------------|----------------------------------------|
| 6       | 0.84, d (6.5)                 | 23.3, q                        | H-4                                               | 3, 4, 5           | H-3a, H-3b, H-4                        |
| NH      | 8.42, d (8.5)                 |                                | H-2                                               |                   | H-2 (Thr-1), H-3 (Thr-1), NH (Ahp)     |
| Thr-1   |                               |                                |                                                   |                   |                                        |
| 1       |                               | 169.4, s                       |                                                   |                   |                                        |
| 2       | 4.59, d (9.3)                 | 54.6, d                        | H-3, NH                                           | 1                 | H-3, H <sub>3</sub> -4, NH, NH (Leu)   |
| 3       | 5.38, br q (6.8)              | 71.8, d                        | H-2, H <sub>3</sub> -4                            |                   | H-2, H <sub>3</sub> -4, NH (Leu)       |
| 4       | 1.19, d (6.6)                 | 17.8, q                        | H-3                                               | 2, 3              | H-2, H-3, NH                           |
| NH      | 7.73, d (9.0)                 |                                | H-2                                               |                   | H-2, H-2 (Thr-2), NH (Thr-2)           |
| Thr-2   |                               |                                |                                                   |                   |                                        |
| 1       |                               | 173.0, s                       |                                                   |                   |                                        |
| 2       | 4.34, dd (8.2, 4.3)           | 57.8, d                        | H-3, NH                                           |                   | H-3, H <sub>3</sub> -4, NH (Thr-1), NH |
| 3       | 3.98, m                       | 66.4, d                        | H-2, H <sub>3</sub> -4                            |                   | H-2, H <sub>3</sub> -4, NH (Thr-1), NH |
| 4       | 1.01, d (6.3)                 | 20.1, q                        | H-3                                               | 2, 3              | H-2, H-3, NH (Thr-1), NH, NH (Ala)     |
| O       |                               |                                |                                                   |                   |                                        |
| NH      | 7.89, br                      |                                | H-2                                               | 1 (Ala)           | H-2 (Ala), NH (Thr-1), NH (Ala)        |
| Ala-1   |                               |                                |                                                   |                   |                                        |
| 1       |                               | 172.9, s                       |                                                   |                   |                                        |
| 2       | 4.39, m                       | 48.1, d                        | H <sub>3</sub> -3, NH                             | 1, 3              | H <sub>3</sub> -3, NH (Thr-2), NH      |
| 3       | 1.21, d (7.3)                 | 18.2, q                        | H-2                                               | 1, 2              | H-2, NH (Thr-2), NH, NH (Thr-1)        |
| NH      | 8.07, m                       |                                | H-2                                               | 1 (Ba-1)          | H-2, H-2 (Ba-1), NH (Thr-2)            |
| Ba-1    |                               |                                |                                                   |                   |                                        |
| 1       |                               | 172.2, s                       |                                                   |                   |                                        |
| 2       | 2.08, m (2H)                  | 37.1, t                        | H <sub>2</sub> -3                                 | 1, 3, 4           | H <sub>2</sub> -3, NH (Ala)            |
| 3       | 1.50, m (2H)                  | 18.7, t                        | H <sub>2</sub> -2, H <sub>3</sub> -4              | 1, 2, 4           |                                        |
| 4       | 0.84, m                       | 13.8, q                        | H <sub>2</sub> -3                                 | 2, 3              |                                        |
| Ala-2   |                               |                                |                                                   |                   |                                        |
| 1       |                               | 174.0, s                       |                                                   |                   |                                        |
| 2       | 3.62, m                       | 50.0, d                        | H <sub>3</sub> -3, NH                             | 1                 | H <sub>3</sub> -3                      |
| 3       | 1.10, d (6.9)                 | 19.6, q                        | H-2, NH <sup>c</sup>                              | 1, 2              | H-2, H <sub>3</sub> -4 (Thr-2)         |
| NH      | 7.18, m                       |                                | H-2 <sup>c</sup>                                  |                   | H-2 (Ba-2)                             |
| Ba-2    |                               |                                |                                                   |                   |                                        |
| 1       |                               | 170.6, s                       |                                                   |                   |                                        |
| 2       | 2.02, m (2H)                  | 37.9, t                        | H <sub>2</sub> -3, H <sub>3</sub> -4 <sup>c</sup> | 1, 3, 4           | H <sub>2</sub> -3, NH (Ala-2)          |
| 3       | 1.48, m (2H)                  | 19.0, t                        | H <sub>2</sub> -2, H <sub>3</sub> -4              | 1, 2, 4           | H <sub>2</sub> -2 (Ba-1)               |
| 4       | 0.84, m                       | 13.8, q                        | H <sub>2</sub> -3                                 | 2, 3              |                                        |

<sup>a</sup>Multiplicity derived from HSQC spectrum. <sup>b</sup>Protons showing long-range correlation with indicated carbon. <sup>c</sup>These couplings were only observed in the TOCSY spectrum.

**Table S3.** NMR spectral data for loggerpeptin C (**3**) at 600 MHz ( $^1\text{H}$ ), 150 MHz ( $^{13}\text{C}$ ) in  $\text{DMSO-}d_6$ 

| C/H no.  | $\delta_{\text{H}}$ (J in Hz) | $\delta_{\text{C}}^a$  | $^1\text{H-}^1\text{H}$ COSY | HMBC <sup>b</sup>                          | ROESY          |                                                                        |
|----------|-------------------------------|------------------------|------------------------------|--------------------------------------------|----------------|------------------------------------------------------------------------|
| Val      | 1                             |                        |                              |                                            |                |                                                                        |
|          | 2                             | 4.59, dd (9.6, 5.0)    | 55.9, d                      | H-3, NH                                    | 1, 3, 4, 5     | H-3, H <sub>3</sub> -4, H <sub>3</sub> -5, NH                          |
|          | 3                             | 2.05, m                | 30.6, d                      | H-2, H <sub>3</sub> -4, H <sub>3</sub> -5  |                | H-2, H <sub>3</sub> -4, H <sub>3</sub> -5                              |
|          | 4                             | 0.72, d (6.7)          | 17.3, q                      | H-3                                        | 2, 3, 5        | H-2, H-3, N-Me (Tyr), NH                                               |
|          | 5                             | 0.84, d (6.7)          | 19.3, q                      | H-3                                        | 2, 3, 4        | H-2, H-3, H <sub>3</sub> -4, N-Me (Tyr)                                |
|          | NH                            | 7.48, d (9.5)          |                              | H-2                                        | 1 (Tyr)        | H-2, H <sub>3</sub> -4, N-Me (Tyr), H-2 (Tyr)                          |
| N-Me-Tyr | 1                             |                        |                              |                                            |                |                                                                        |
|          | 2                             | 4.90, dd (11.5, 2.4)   | 60.9, d                      | H-3a, H-3b                                 |                | H-3a, H-3b, H-5/9, NH (Val), H-2 (Phe), H-3b (Phe), H-5/9 (Phe), N-Me  |
|          | 3a                            | 3.10, dd (-14.3, 2.3)  | 32.9, t                      | H-2, H-3b                                  | 4, 5/9         | H-2, H-3b, H-5/9, H-2 (Phe)                                            |
|          | 3b                            | 2.71, m                |                              | H-2, H-3a                                  | 2, 4, 5/9      | H-3a, H-5/9                                                            |
|          | 4                             |                        | 127.7, s                     |                                            |                |                                                                        |
|          | 5/9                           | 7.00, d (8.5)          | 130.4, d                     | H-6/8                                      | 3, 5/9, 7, 6/8 | H-2, H-3a, H-3b, N-Me, H-6/8, H-2 (Phe)                                |
|          | 6/8                           | 6.77, d (8.5)          | 115.3, d                     | H-5/9                                      | 4, 6/8, 7      | H-5/9, H-3b (Phe)                                                      |
|          | 7                             |                        | 156.4, s                     |                                            |                |                                                                        |
|          | 7-OH                          |                        |                              |                                            |                |                                                                        |
|          | N-Me                          | 2.75, s                | 30.3, q                      |                                            | 2, 1 (Phe)     | H-2, H-5/9, H <sub>3</sub> -4 (Val), H <sub>3</sub> -5 (Val), NH (Val) |
| Phe      | 1                             |                        |                              |                                            |                |                                                                        |
|          | 2                             | 4.76, dd (11.9, 4.0)   | 50.2, d                      | H-3a, H-3b                                 | 1, 3, 2 (Ahp)  | H-3a, H-3b, H-5/9, H-2 (Tyr), H-3a (Tyr), H-5/9 (Tyr)                  |
|          | 3a                            | 2.86, dd (-15.3, 11.6) | 35.2, t                      | H-2, H-3b                                  | 2, 4, 5/9      | H-3b, H-5/9, H-6 (Ahp)                                                 |
|          | 3b                            | 1.81, dd (-14.2, 3.5)  |                              | H-2, H-3a                                  | 4, 5/9         | H-2, H-3a, H-5/9, H-6 (Ahp), H-2 (Phe)                                 |
|          | 4                             |                        | 137.1, s                     |                                            |                |                                                                        |
|          | 5/9                           | 6.83, d (7.4)          | 129.5, d                     | H-6/8                                      | 3, 5/9, 7      | H-2, H-3a, H-3b, H-6/8, H-5b (Ahp), H-6 (Ahp)                          |
|          | 6/8                           | 7.17, d (7.4)          | 127.7, d                     | H-5/9                                      | 4, 6/8         | H-5/9                                                                  |
|          | 7                             | 7.14, m                | 126.2, d                     |                                            | 5/9            | H-5/9                                                                  |
| Ahp      | 2                             |                        |                              |                                            |                |                                                                        |
|          | 3                             | 3.63, m                | 48.7, d                      | H-4a, H-4b, NH                             | 1 (Leu)        | H-4b, H-5b, NH                                                         |
|          | 4a                            | 2.41, m                | 21.5, t                      | H-3, H-4b, H-5a                            |                | H-4b, H-5a, H-5b, NH                                                   |
|          | 4b                            | 1.58, m                |                              | H-3, H-4a, H-5a                            |                | H-3, H-4a                                                              |
|          | 5a                            | 1.69, m                | 29.3, t                      | H-4a, H-5b, H-6                            |                | H-4a, H-5b, H-6                                                        |
|          | 5b                            | 1.56, m                |                              | H-5a, H-6                                  |                | H-5a, H-6, H-5/9 (Phe)                                                 |
|          | 6                             | 5.06, br s             | 73.7, d                      | H-5a, H-5b                                 | 2              | H-5a, H-5b, H-2 (Phe), H-3a (Phe), H-3b (Phe), H-5/9 (Phe)             |
|          | 6-OH                          |                        |                              |                                            |                |                                                                        |
|          | NH                            | 7.09, d (9.0)          |                              | H-3                                        |                | H-3, H-4a, H-2 (Leu), H-3 (Thr), NH (Leu)                              |
| Leu      | 1                             |                        |                              |                                            |                |                                                                        |
|          | 2                             | 4.18, m                | 50.5, d                      | H-3a, H-3b, NH                             |                | H-3a, H <sub>3</sub> -5, NH, NH (Ahp)                                  |
|          | 3a                            | 1.71, m                | 39.1, t                      | H-2, H-3b, H-4                             |                | H-2, H-3a, H <sub>3</sub> -5, H <sub>3</sub> -6                        |
|          | 3b                            | 1.31, m                |                              | H-2, H-3a                                  |                | H-3a, NH                                                               |
|          | 4                             | 1.46, m                | 24.1, d                      | H-3a, H <sub>3</sub> -5, H <sub>3</sub> -6 |                | H <sub>3</sub> -5, H <sub>3</sub> -6                                   |
|          | 5                             | 0.74, d (6.6)          | 21.1, q                      | H-4                                        | 3, 6           | H-2, H-3a, H-4                                                         |
|          | 6                             | 0.85, d (6.6)          | 23.3, q                      | H-4                                        | 3, 4, 5        | H-4                                                                    |

**Table S3. Continued**

| C/H no. | $\delta_{\text{H}}$ (J in Hz) | $\delta_{\text{C}}^{\text{a}}$ | $^1\text{H}-^1\text{H}$ COSY         | HMBC <sup>b</sup> | ROESY                                                  |
|---------|-------------------------------|--------------------------------|--------------------------------------|-------------------|--------------------------------------------------------|
|         | NH                            | 8.39, d (8.5)                  |                                      |                   |                                                        |
| Thr     | 1                             |                                | H-2                                  | 1 (Thr)           | H-2, H-3b, H-4, H-2 (Thr), H-3 (Thr), NH (Ahp)         |
|         | 2                             | 4.61, d (9.6)                  | NH                                   | 1, 4              | H-3, H <sub>3</sub> -4, NH, NH (Leu)                   |
|         | 3                             | 5.41, q (6.6)                  | H <sub>3</sub> -4                    | 1 (Val), 4        | H-2, H <sub>3</sub> -4, NH (Ahp), NH (Leu)             |
|         | 4                             | 1.19, d (6.6)                  | H-3                                  | 2, 3              | H-2, H-3, NH                                           |
|         | NH                            | 7.05, d (9.0)                  | H-2                                  |                   | H-2, H <sub>3</sub> -4, H-3 (Ala), H-3 (Abu), NH (Abu) |
| Abu     | 1                             |                                |                                      |                   |                                                        |
|         | 2                             |                                |                                      |                   |                                                        |
|         | 3                             | 6.48, q                        | H <sub>3</sub> -4                    | 1, 4              | H <sub>3</sub> -4, NH (Thr)                            |
|         | 4                             | 1.63, d (7.0)                  | H-3                                  | 2, 3              | H-3, H-4 (Leu), NH                                     |
|         | NH                            | 9.26, br s                     | H <sub>3</sub> -4                    | 1 (Ala)           | H-4, H-2 (Ala), H-3 (Ala), NH (Ala), NH (Thr)          |
| Ala     | 1                             |                                |                                      |                   |                                                        |
|         | 2                             | 4.33, m                        | H <sub>3</sub> -3, NH                | 1, 3              | H <sub>3</sub> -3, NH, NH (Abu)                        |
|         | 3                             | 1.35, d (7.2)                  | H-2                                  | 1, 2              | H-2, NH, NH (Abu), H-2 (Val)                           |
|         | NH                            | 8.10, d (6.6)                  | H-2                                  | 1                 | H-2, H <sub>3</sub> -3, H-2 (Ba)                       |
| Ba      | 1                             |                                |                                      |                   |                                                        |
|         | 2                             | 2.10, m (2H)                   | H <sub>2</sub> -3                    | 1, 3, 4           | H-3, H <sub>3</sub> -4, NH (Ala)                       |
|         | 3                             | 1.52, m (2H)                   | H <sub>2</sub> -2, H <sub>3</sub> -4 | 1, 2, 4           | H-2, H <sub>3</sub> -4                                 |
|         | 4                             | 0.86, t (7.5)                  | H <sub>2</sub> -3                    | 2, 3              | H-2, H-3                                               |

<sup>a</sup>Multiplicity derived from HSQC spectrum. <sup>b</sup> Protons showing long-range correlation with indicated carbon.



**Table S4.** NMR spectral data for molassamide (**4**) at 600 MHz (<sup>1</sup>H), 150 MHz (<sup>13</sup>C) in DMSO-*d*<sub>6</sub>

| C/H no.  | $\delta_{\text{H}}$ (J in Hz) | $\delta_{\text{C}}^{\text{a}}$ | <sup>1</sup> H- <sup>1</sup> H COSY | HMBC <sup>b</sup>                    | ROESY                     |                                                                                      |
|----------|-------------------------------|--------------------------------|-------------------------------------|--------------------------------------|---------------------------|--------------------------------------------------------------------------------------|
| Val      | 1                             | 173.0, s                       |                                     |                                      |                           |                                                                                      |
|          | 2                             | 4.55, dd (8.4, 4.4)            | NH                                  | 1 (Tyr)                              |                           |                                                                                      |
|          | 3                             | 2.02, m                        | 30.3, d                             | H <sub>3</sub> -4, H <sub>3</sub> -5 | 5                         | H <sub>3</sub> -4, H <sub>3</sub> -5, 7-OH (Tyr)                                     |
|          | 4                             | 0.79, d (7.0)                  | 17.9, q                             | H-3                                  | 3, 5                      | H-3, N-Me (Tyr), 7-OH (Tyr)                                                          |
|          | 5                             | 0.87, d (7.0)                  | 19.1, q                             | H-3                                  | 2, 3, 4                   | H-3, N-Me (Tyr), 7-OH (Tyr)                                                          |
|          | NH                            | 7.77, d (8.4)                  |                                     | H-2                                  | 1                         | H-3 (Thr-2), H <sub>3</sub> -4 (Thr-2), H-2 (Ala), H <sub>3</sub> -3 (Ala), NH (Ala) |
| N-Me-Tyr | 1                             | 169.7, s                       |                                     |                                      |                           |                                                                                      |
|          | 2                             | 4.88, d (11.0)                 | 60.9, d                             | H-3a, H-3b                           | 1 (Phe), 3, N-Me          | H-3a, H-5/9, H-2 (Phe), H-3b (Phe), H-5/9 (Phe), N-Me                                |
|          | 3a                            | 3.16, dd (-13.3, 5.5)          | 32.8, t                             | H-2, H-3b                            |                           | H-2, H-3b, H-5/9, H-2 (Phe)                                                          |
|          | 3b                            | 2.68 dd (-15.1, 11.5)          |                                     | H-2, H-3a                            | 2, 4, 5/9                 | H-3a, H-5/9                                                                          |
|          | 4                             |                                | 127.8, s                            |                                      |                           |                                                                                      |
|          | 5/9                           | 7.02, d (8.3)                  | 130.7, d                            | H-6/8                                | 3, 5/9, 6, 7              | H-2, H-3a, H-3b, H-6/8, N-Me, H-2 (Phe)                                              |
|          | 6/8                           | 6.76, d (8.3)                  | 115.3, d                            | H-5/9                                | 4, 6/8, 7                 | H-2 (Phe), H-3b (Phe), H-5/9                                                         |
|          | 7                             |                                | 156.5, s                            |                                      |                           |                                                                                      |
|          | 7-OH                          | 4.45                           |                                     |                                      |                           |                                                                                      |
|          | N-Me                          | 2.75, s                        | 30.4, q                             |                                      | 2, 1 (Phe)                | H-2, H-5/9, H <sub>3</sub> -4 (Val), H <sub>3</sub> -5 (Val)                         |
| Phe      | 1                             | 170.8, s                       |                                     |                                      |                           |                                                                                      |
|          | 2                             | 4.76, dd (11.0, 3.9)           | 50.4, d                             | H-3a, H-3b                           | 1, 3, 4, 2 (Ahp), 6 (Ahp) | H-3b, H-2 (Tyr), H-3a (Tyr), H-6 (Ahp), H-5/9, H-5/9 (Tyr)                           |
|          | 3a                            | 2.87, dd (-14.3, 12.3)         | 35.2, t                             | H-2, H-3b                            | 1, 2, 4, 5/9              | H-3b, H-6 (Ahp), H-5/9                                                               |
|          | 3b                            | 1.87, dd (-15.2, 3.1)          |                                     | H-2, H-3a                            | 2, 4, 5/9                 | H-2, H-3a, H-2 (Tyr), H-6 (Ahp), H-5/9                                               |
|          | 4                             |                                | 137.2, s                            |                                      |                           |                                                                                      |
|          | 5/9                           | 6.84, d (7.4)                  | 129.5, d                            | H-6/8                                | 3, 5/9, 7                 | H-2, H-3a, H-6/8, H-4b (Ahp), H-5b (Ahp), H-6 (Ahp), H-2 (Tyr)                       |
|          | 6/8                           | 7.18, d (7.4)                  | 127.8, d                            | H-5/9                                | 4, 6/8                    | H-5/9                                                                                |
| 7        | 7.15, m                       | 126.3, d                       |                                     | 5/9                                  | H-5/9                     |                                                                                      |
| Ahp      | 2                             | 169.2, s                       |                                     |                                      |                           |                                                                                      |
|          | 3                             | 3.83, m                        | 48.4, d                             | H-4b, NH                             | 2, 5                      | H-4a, H-4b, NH, H-7 (Phe)                                                            |
|          | 4a                            | 2.35, m                        | 21.7, t                             | H-4b                                 |                           | H-4b, H-5a                                                                           |
|          | 4b                            | 1.56, m                        |                                     | H-3, H-4a, H-5a                      | 2, 3, 6                   | H-4a, H-5a, H-3 (Abu)                                                                |
|          | 5a                            | 1.72, m                        | 29.4, t                             | H-5a, H-6                            |                           | H-4a, H-4b, H-6                                                                      |
|          | 5b                            | 1.58, m                        |                                     | H-5a, H-6                            |                           | H-9, H-5/9 (Phe)                                                                     |
|          | 6                             | 5.09, br s                     | 73.9, d                             | H-5a, H-5b                           | 2, 4                      | H-5a, H-5b, H-3a (Phe), H-3b (Phe), H-5/9 (Phe)                                      |
|          | 6-OH                          |                                |                                     |                                      |                           |                                                                                      |
| NH       | 7.13, d (9.0)                 |                                | H-3                                 |                                      | H-3, H-4a, H-4b           |                                                                                      |
| Abu      | 1                             | 163.2, s                       |                                     |                                      |                           |                                                                                      |
|          | 2                             | 130.2, s                       |                                     |                                      |                           |                                                                                      |
|          | 3                             | 6.56, q                        | 132.0, d                            | H <sub>3</sub> -4                    | 1, 4                      | H <sub>3</sub> -4, H-3 (Ahp), NH                                                     |
|          | 4                             | 1.51, d                        | 13.1, q                             | H-3                                  | 1, 2, 3                   | H-3, NH                                                                              |
|          | NH                            | 8.90, br s                     |                                     | H <sub>3</sub> -4                    | 1                         | H-3, H <sub>3</sub> -4, H <sub>3</sub> -4 (Thr-2)                                    |
| Thr-1    | 1                             | 169, s                         |                                     |                                      |                           |                                                                                      |

**Table S4. Continued**

| C/H no. | $\delta_{\text{H}}$ (J in Hz) | $\delta_{\text{C}}^{\text{a}}$ | $^1\text{H}-^1\text{H}$ COSY | HMBC <sup>b</sup>                    | ROESY        |                                                                          |
|---------|-------------------------------|--------------------------------|------------------------------|--------------------------------------|--------------|--------------------------------------------------------------------------|
|         | 2                             | 4.60, br                       | 55.5, d                      | NH                                   |              | H-3, H <sub>3</sub> -4, H <sub>3</sub> -4 (Abu), NH                      |
|         | 3                             | 5.42, br                       | 71.8, d                      |                                      |              | H-2, H <sub>3</sub> -4                                                   |
|         | 4                             | 1.27, d (6.0)                  | 17.9, q                      | H-3                                  | 2, 3         | H-2, H-3, NH                                                             |
|         | NH                            | 7.69, br d (6.0)               |                              | H-2                                  |              | H-2, H <sub>3</sub> -4, H-3 (Thr-2), H-2 (Val)                           |
| Thr-2   | 1                             |                                | 173.0, s                     |                                      |              |                                                                          |
|         | 2                             | 4.39, dd (8.4, 4.2)            | 57.7, d                      | H-3, NH                              |              | H-3                                                                      |
|         | 3                             | 4.09, br                       | 66.6, d                      | H <sub>3</sub> -4                    |              | H-2, H <sub>3</sub> -4, H-2 (Ala), OH, H-5/9 (Tyr), NH (Thr-1), NH (Val) |
|         | 4                             | 1.04, d (6.3)                  | 19.1, q                      | H-3                                  | 2, 3         | H-2, H-3, OH, H-5/9 (Tyr), NH (Thr-1), NH (Ala), NH (Val)                |
|         | OH                            | 4.50, br                       |                              |                                      |              | H-3, H <sub>3</sub> -4, NH (Thr-1), NH (Val)                             |
|         | NH                            | 7.63, br                       |                              | H-2                                  |              |                                                                          |
| Ala     | 1                             |                                | 172.9, s                     |                                      |              |                                                                          |
|         | 2                             | 4.37, m                        | 48.1, d                      | H <sub>3</sub> -3, NH                | 1, 3         | H <sub>3</sub> -3, H-2 (Ba), H <sub>3</sub> -4 (Thr-2), NH, NH (Val)     |
|         | 3                             | 1.21, d (7.0)                  | 17.9, q                      | H-2                                  | 1, 2         | H-2, NH, NH (Val)                                                        |
|         | NH                            | 8.05, d (7.4)                  |                              | H-2                                  | 2, 3, 1 (Ba) | H-2, H <sub>3</sub> -3, H-2 (Ba), NH (Val)                               |
| Ba      | 1                             |                                | 172.3, s                     |                                      |              |                                                                          |
|         | 2                             | 2.08, m (2H)                   | 37.0, t                      | H <sub>2</sub> -3                    | 1, 3, 4      | H-3, NH (Ala)                                                            |
|         | 3                             | 1.50, m (2H)                   | 18.7, t                      | H <sub>2</sub> -2, H <sub>3</sub> -4 | 1, 2, 4      | H-2, H <sub>3</sub> -4                                                   |
|         | 4                             | 0.84, t (7.5)                  | 13.6, q                      | H <sub>2</sub> -3                    | 2, 3         | H-2, H-3                                                                 |

<sup>a</sup>Multiplicity derived from HSQC spectrum. <sup>b</sup> Protons showing long-range correlation with indicated carbon.

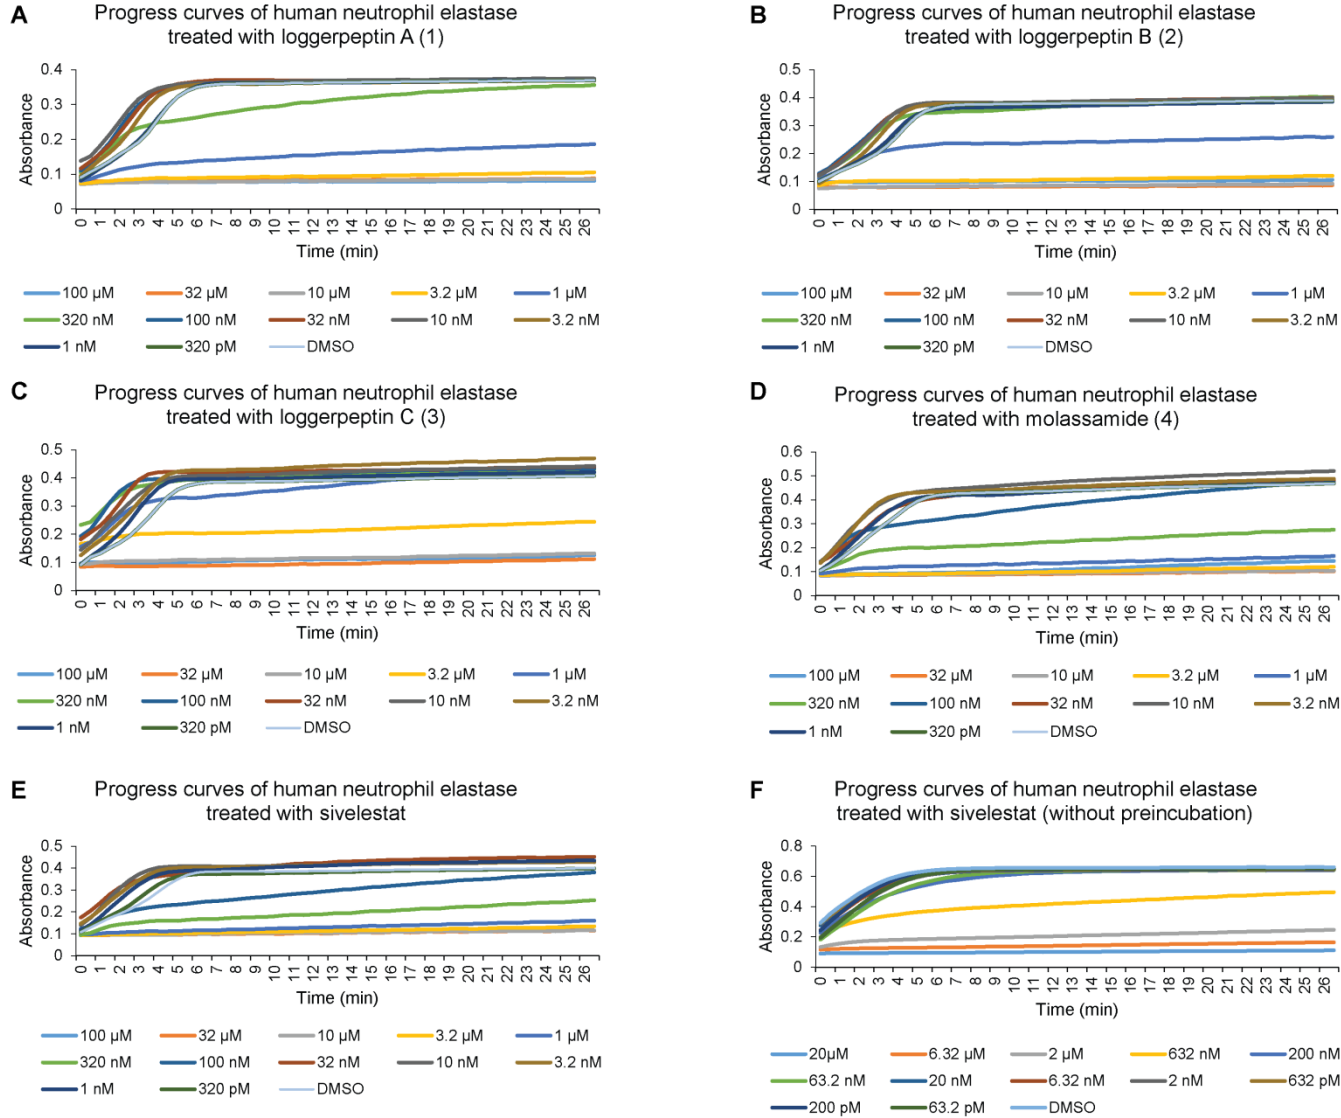

**Figure S1.** Progress curves of HNE treated with loggerpeptins A–C (1–3), molassamide (4) and sivelestat. Panels A–E were obtained by pre-incubating HNE with the inhibitors for 15 min whereas panel F was obtained without pre-incubation step.

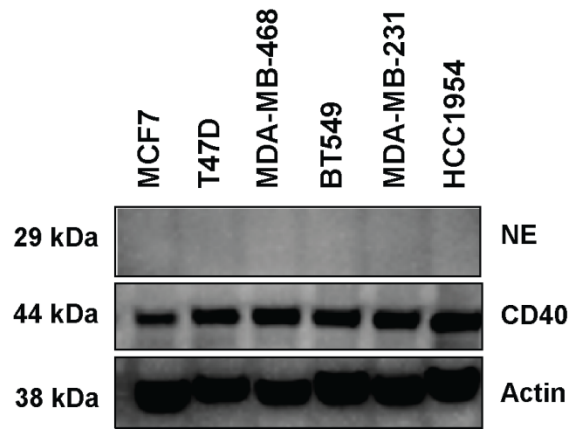

**Figure S2.** The expression levels of NE and CD40 in a panel of breast cancer cell lines assessed by Western blot. Actin was used as a loading control.

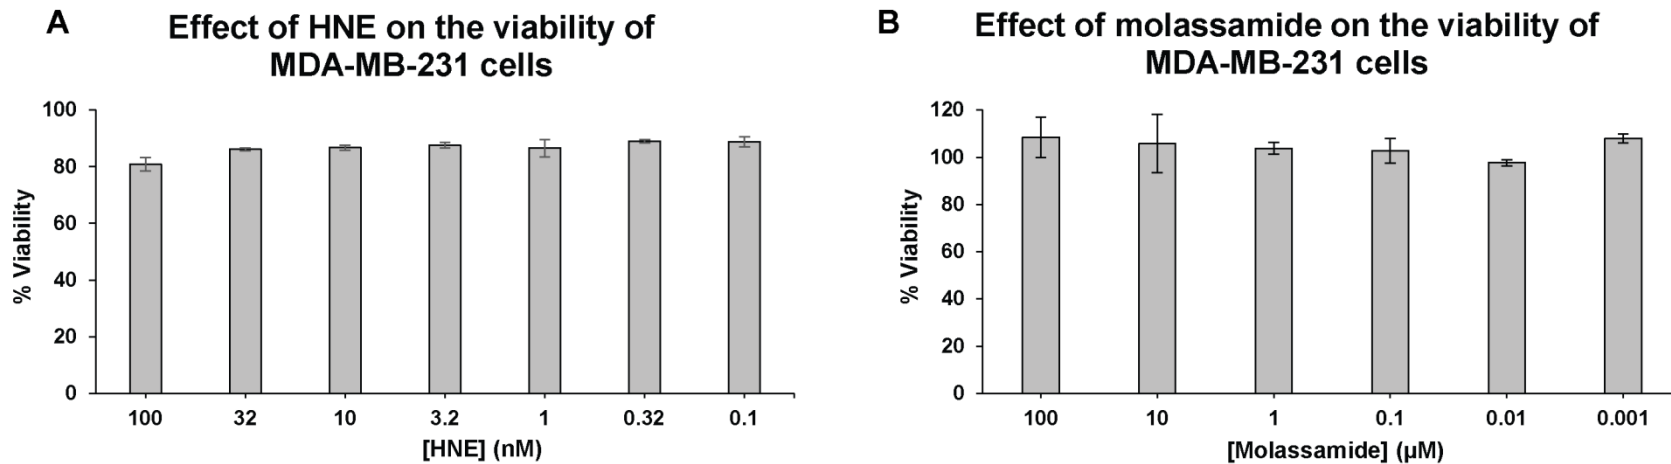

**Figure S3.** The effects of HNE and molassamide (**4**) on cell viability. MDA-MB-231 cells were seeded in 96-well plates. Following 24 h incubation, the cells were treated with different concentrations of **4**, HNE, or solvent control for 48 h. The cell viability was measured using 3-(4,5-dimethylthiazol-2-yl)-2,5-diphenyltetrazolium bromide (MTT assay).

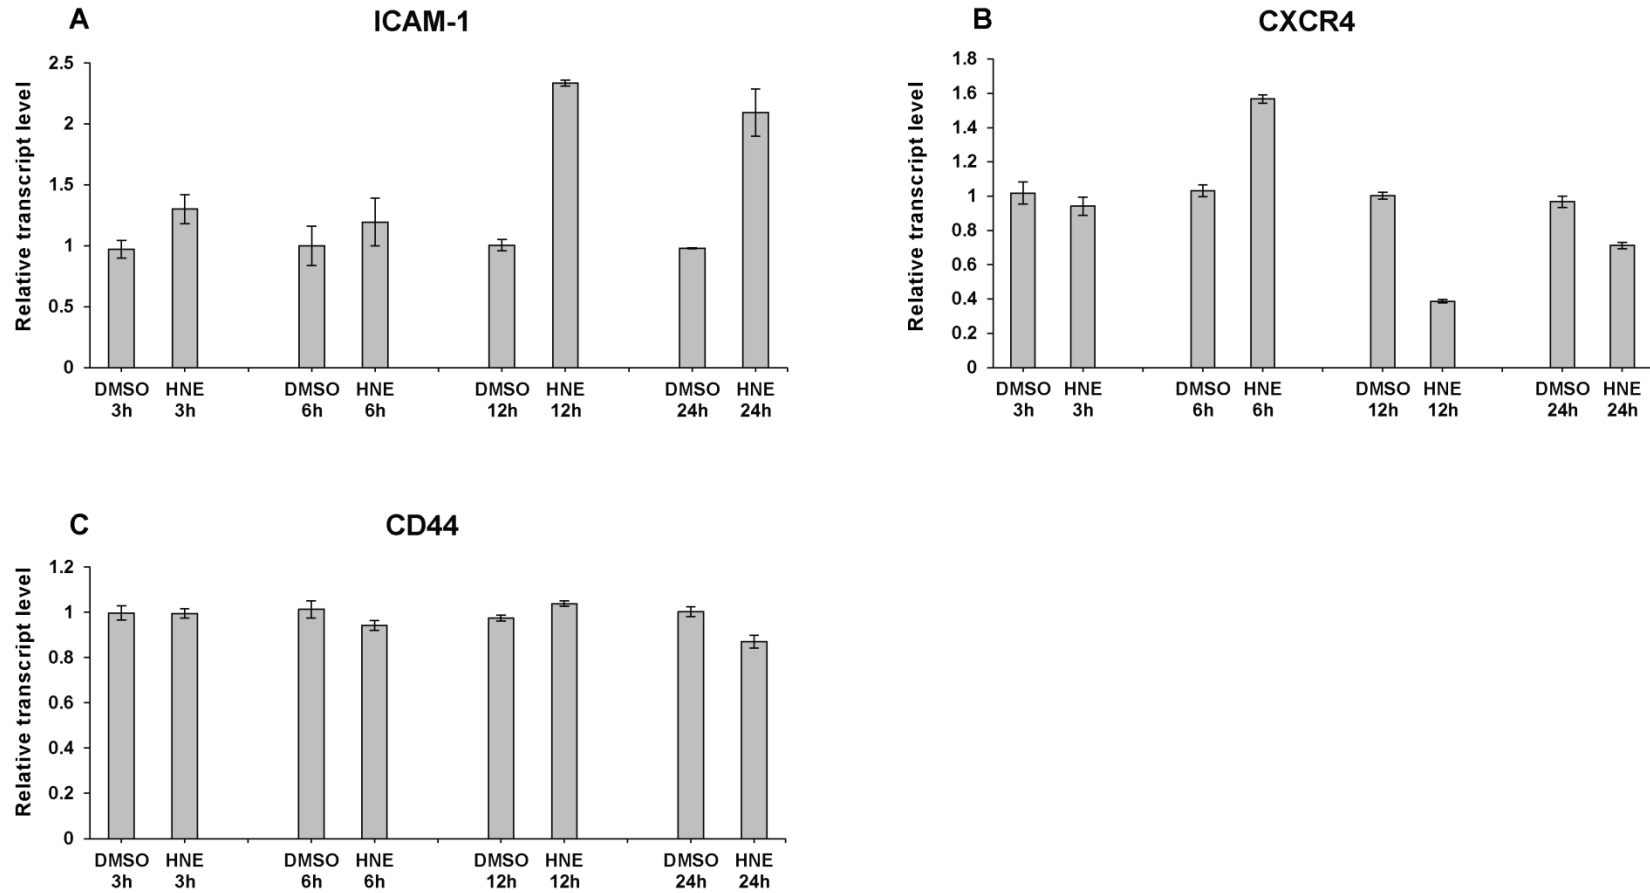

**Figure S4.** The effects of HNE on expression levels of NF $\kappa$ B target genes in MDA-MB-231 cells assessed by RT-qPCR. MDA-MB-231 cells were seeded in 6-well plates, incubated overnight, then starved for additional 24 h. The media was then replaced with serum free DMEM supplemented with DMSO or 100 nM HNE and the cells were incubated for the indicated time points. Following the incubation periods, the RNA was isolated, cDNA was synthesized, and the expression levels of each target gene were assessed by RT-qPCR.

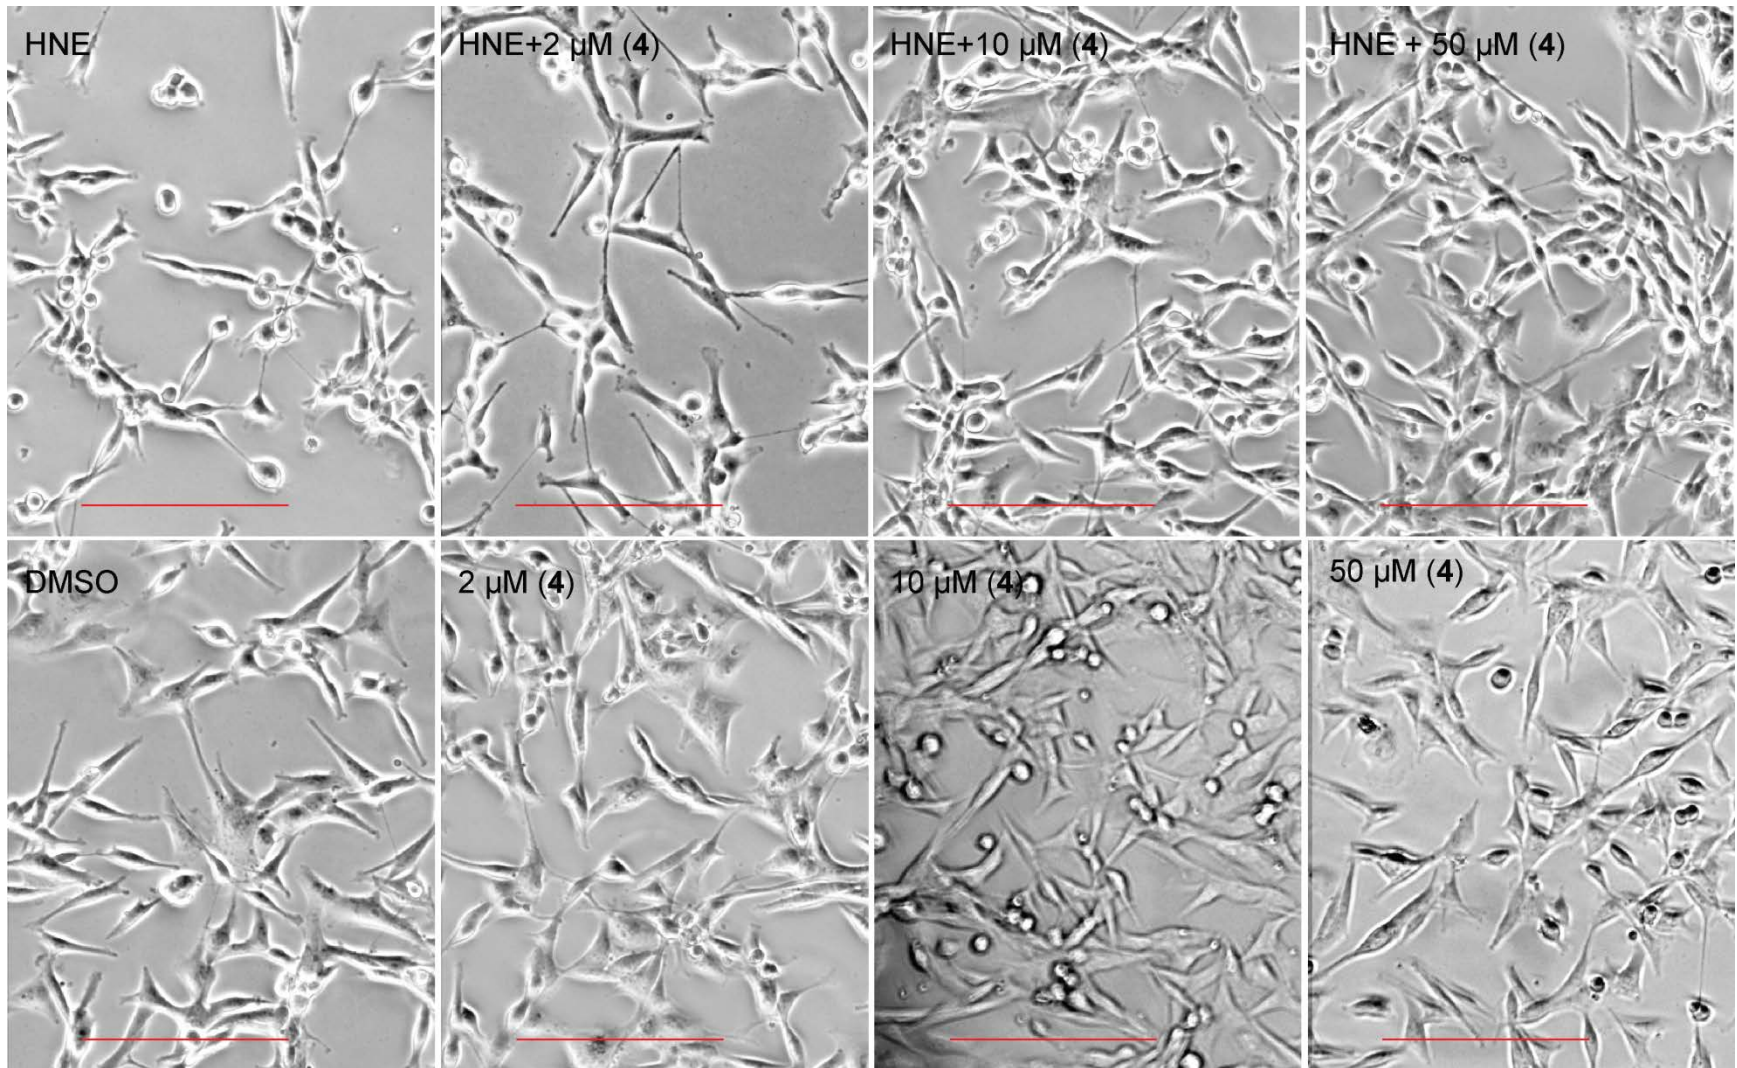

**Figure S5.** The effects of molassamide (**4**) on HNE-induced morphological changes in MDA-MB-231 cells. MDA-MB-231 cells were treated with **4** for 3 h in the presence or absence of 100 nM HNE. Scale bar 200 μm.

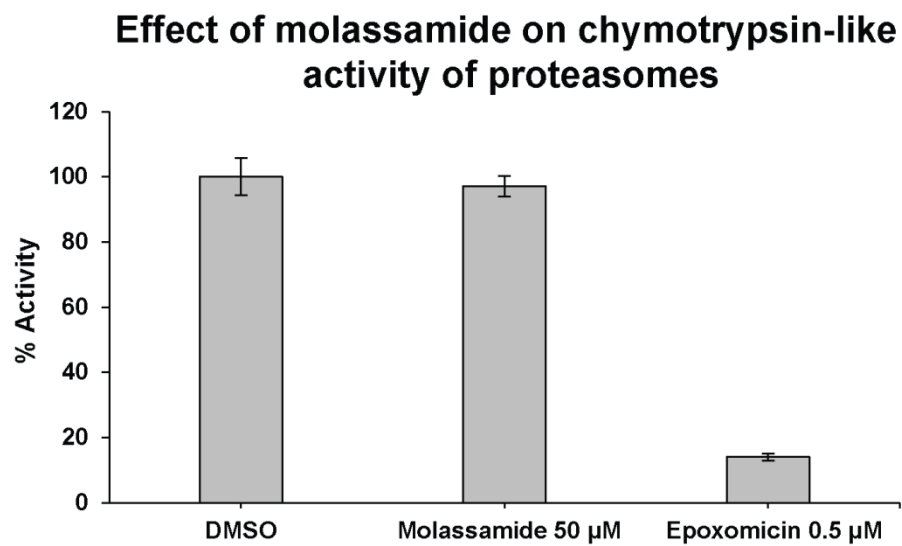

**Figure S6.** The effect of molassamide (**4**) on the chymotrypsin-like activity of proteasomes *in vitro* assessed using proteasome 20S assay kit (EnzoLife Sciences).



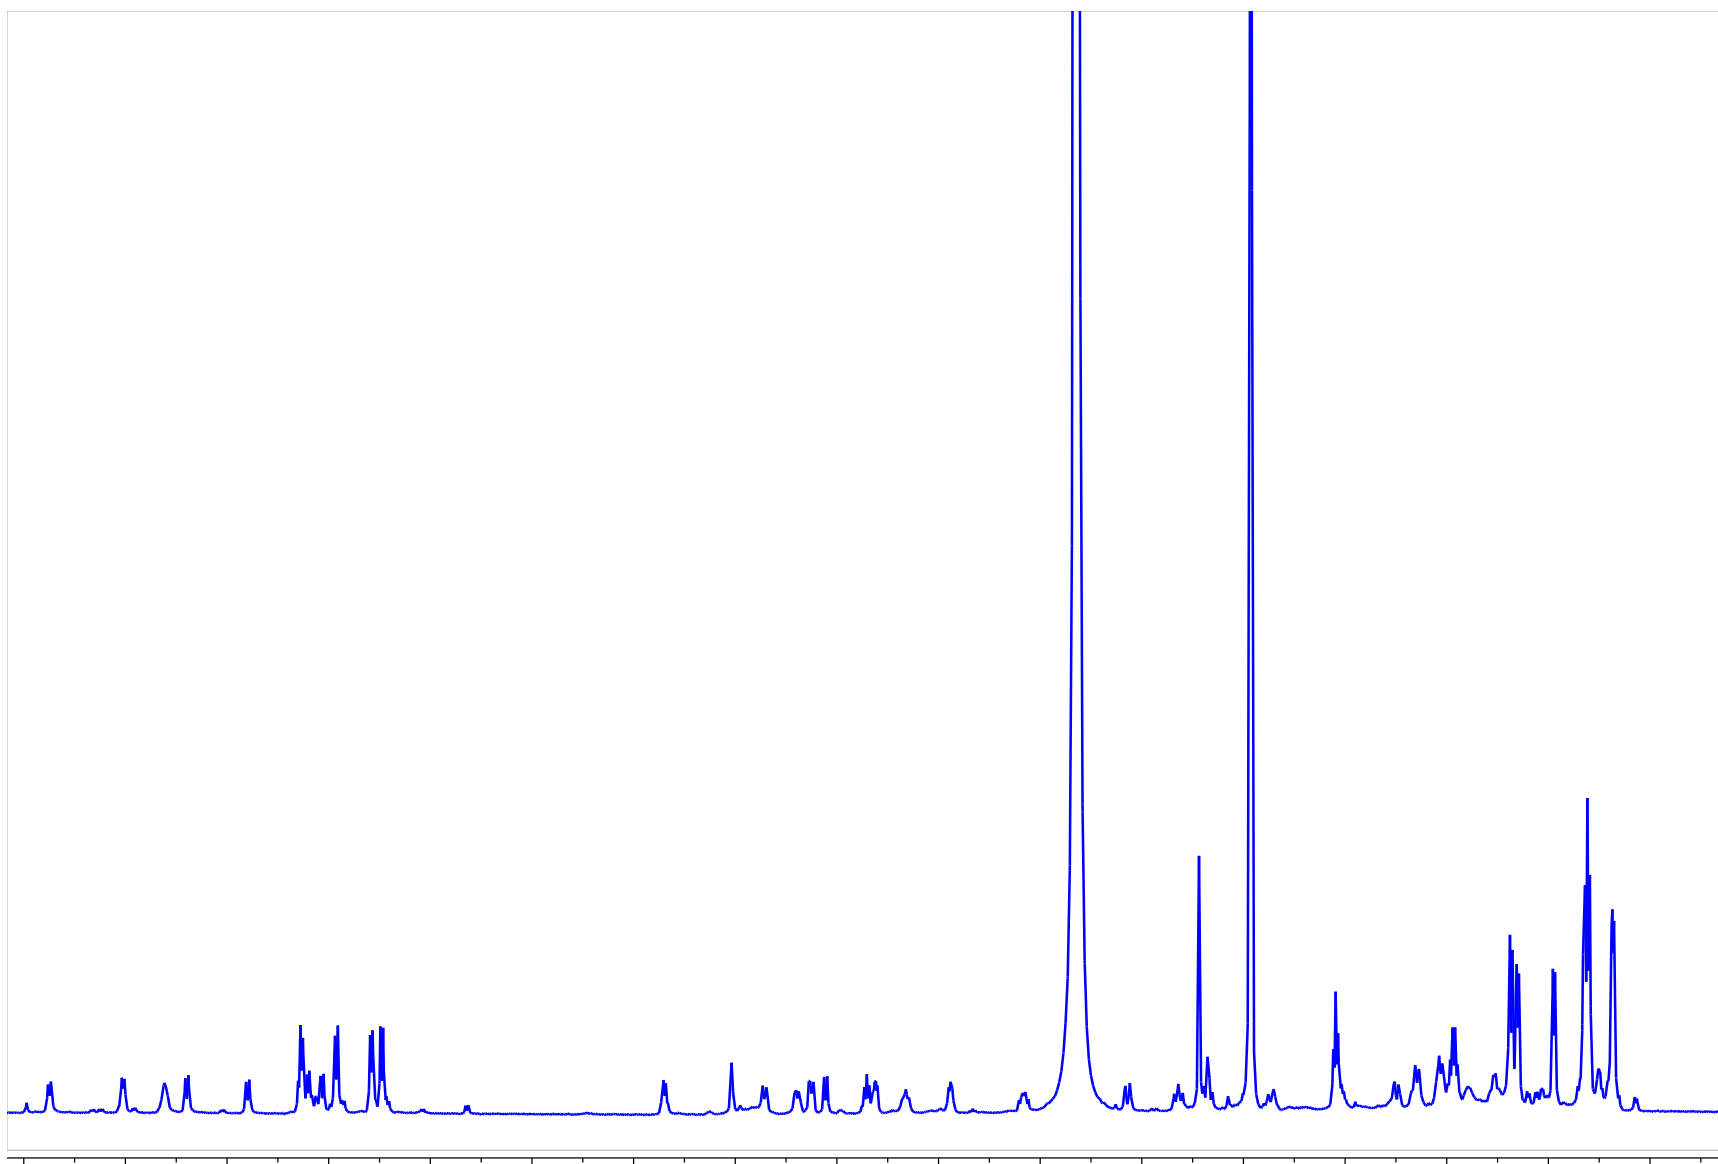

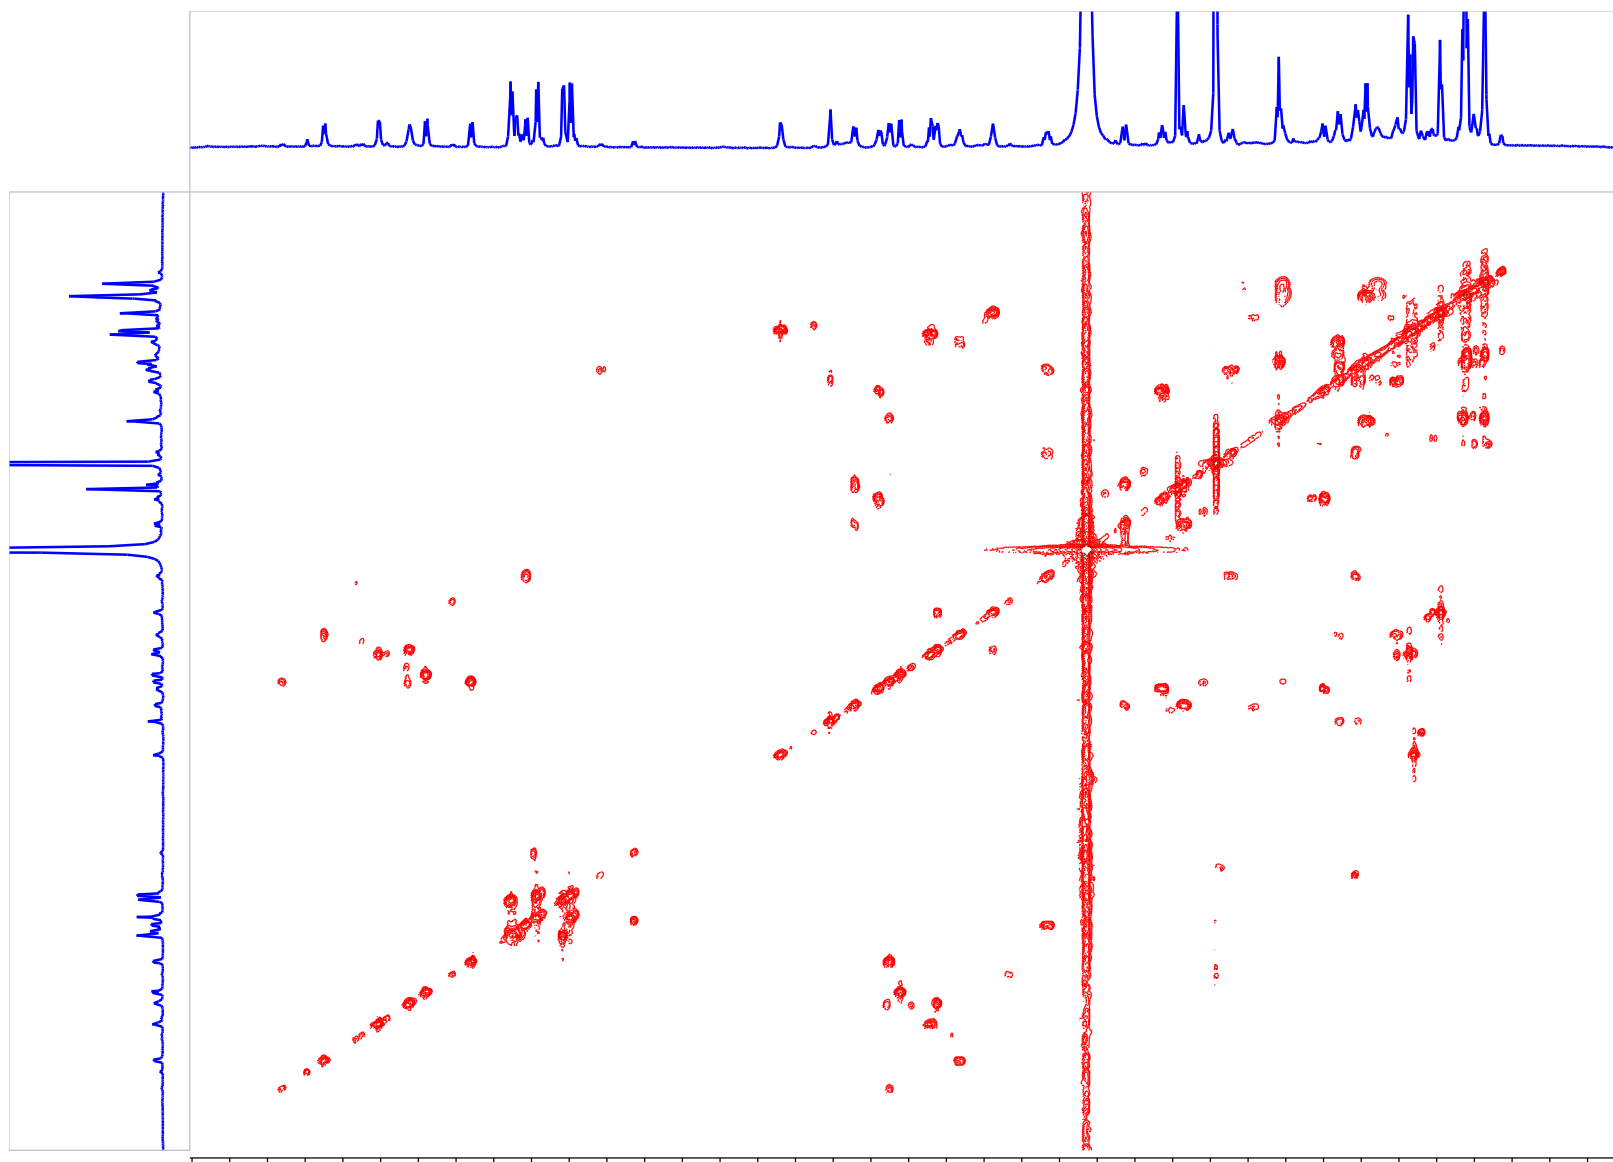

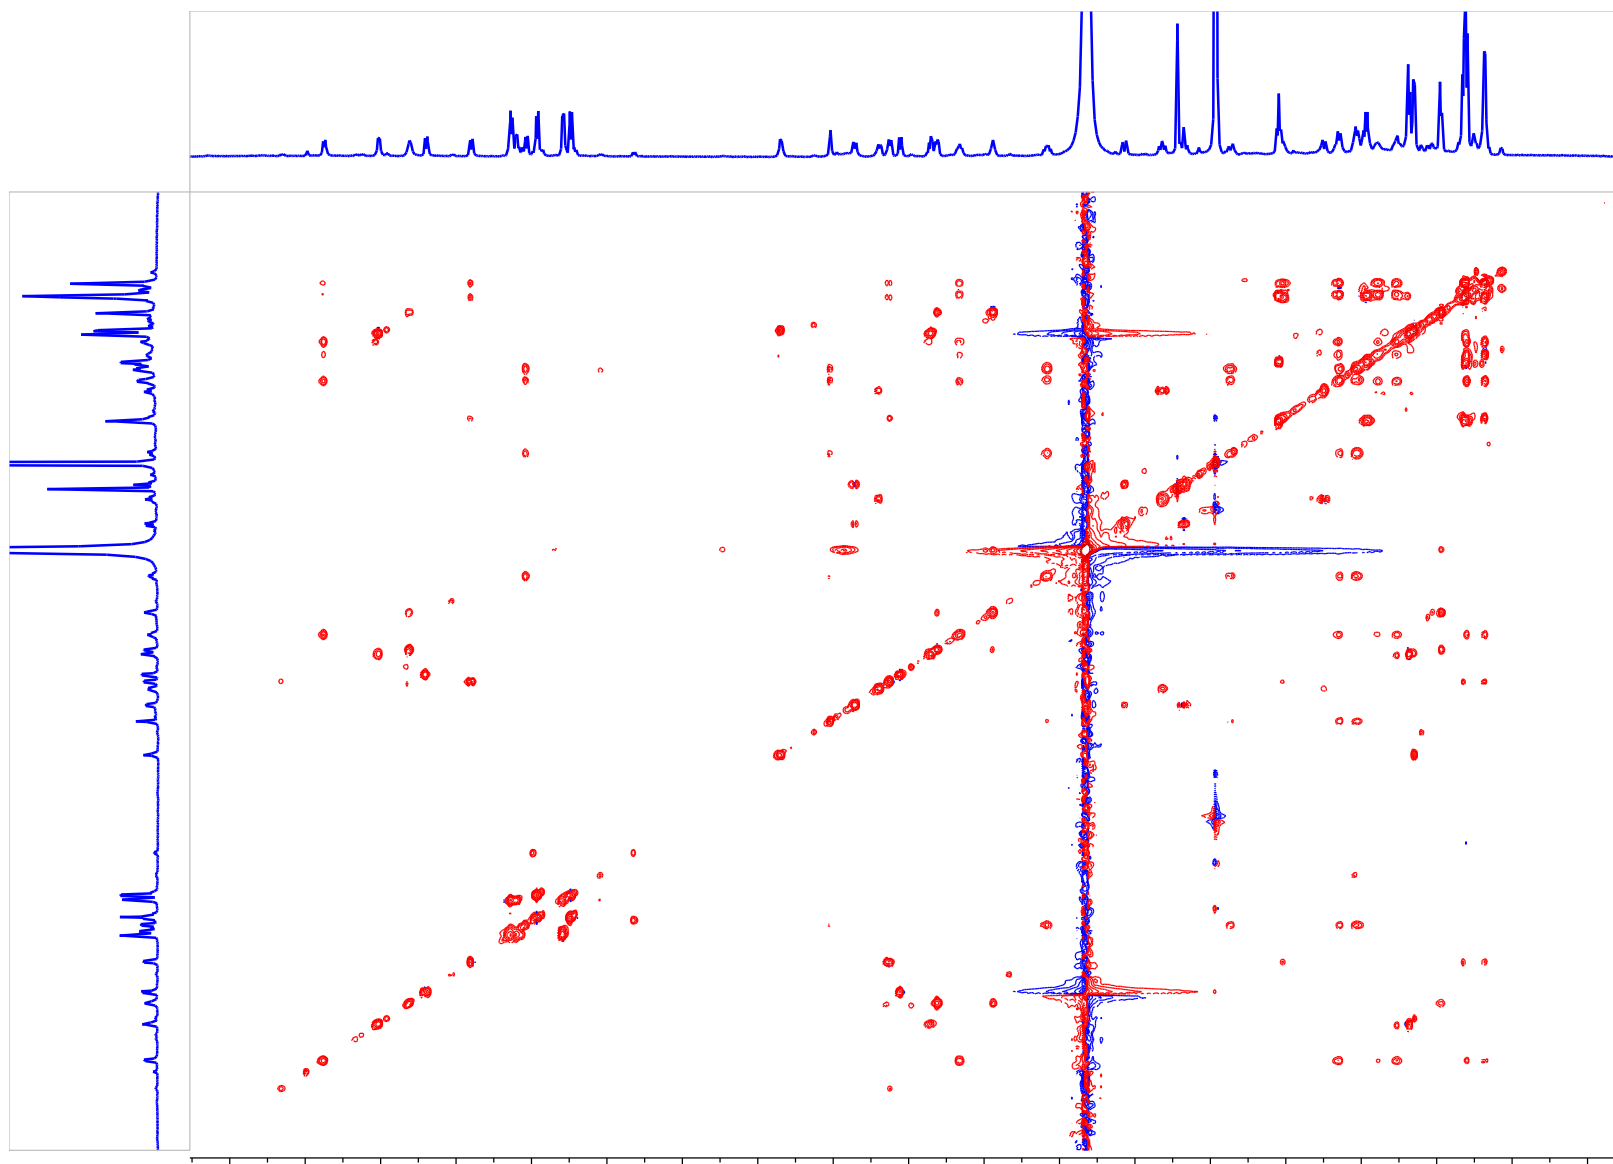

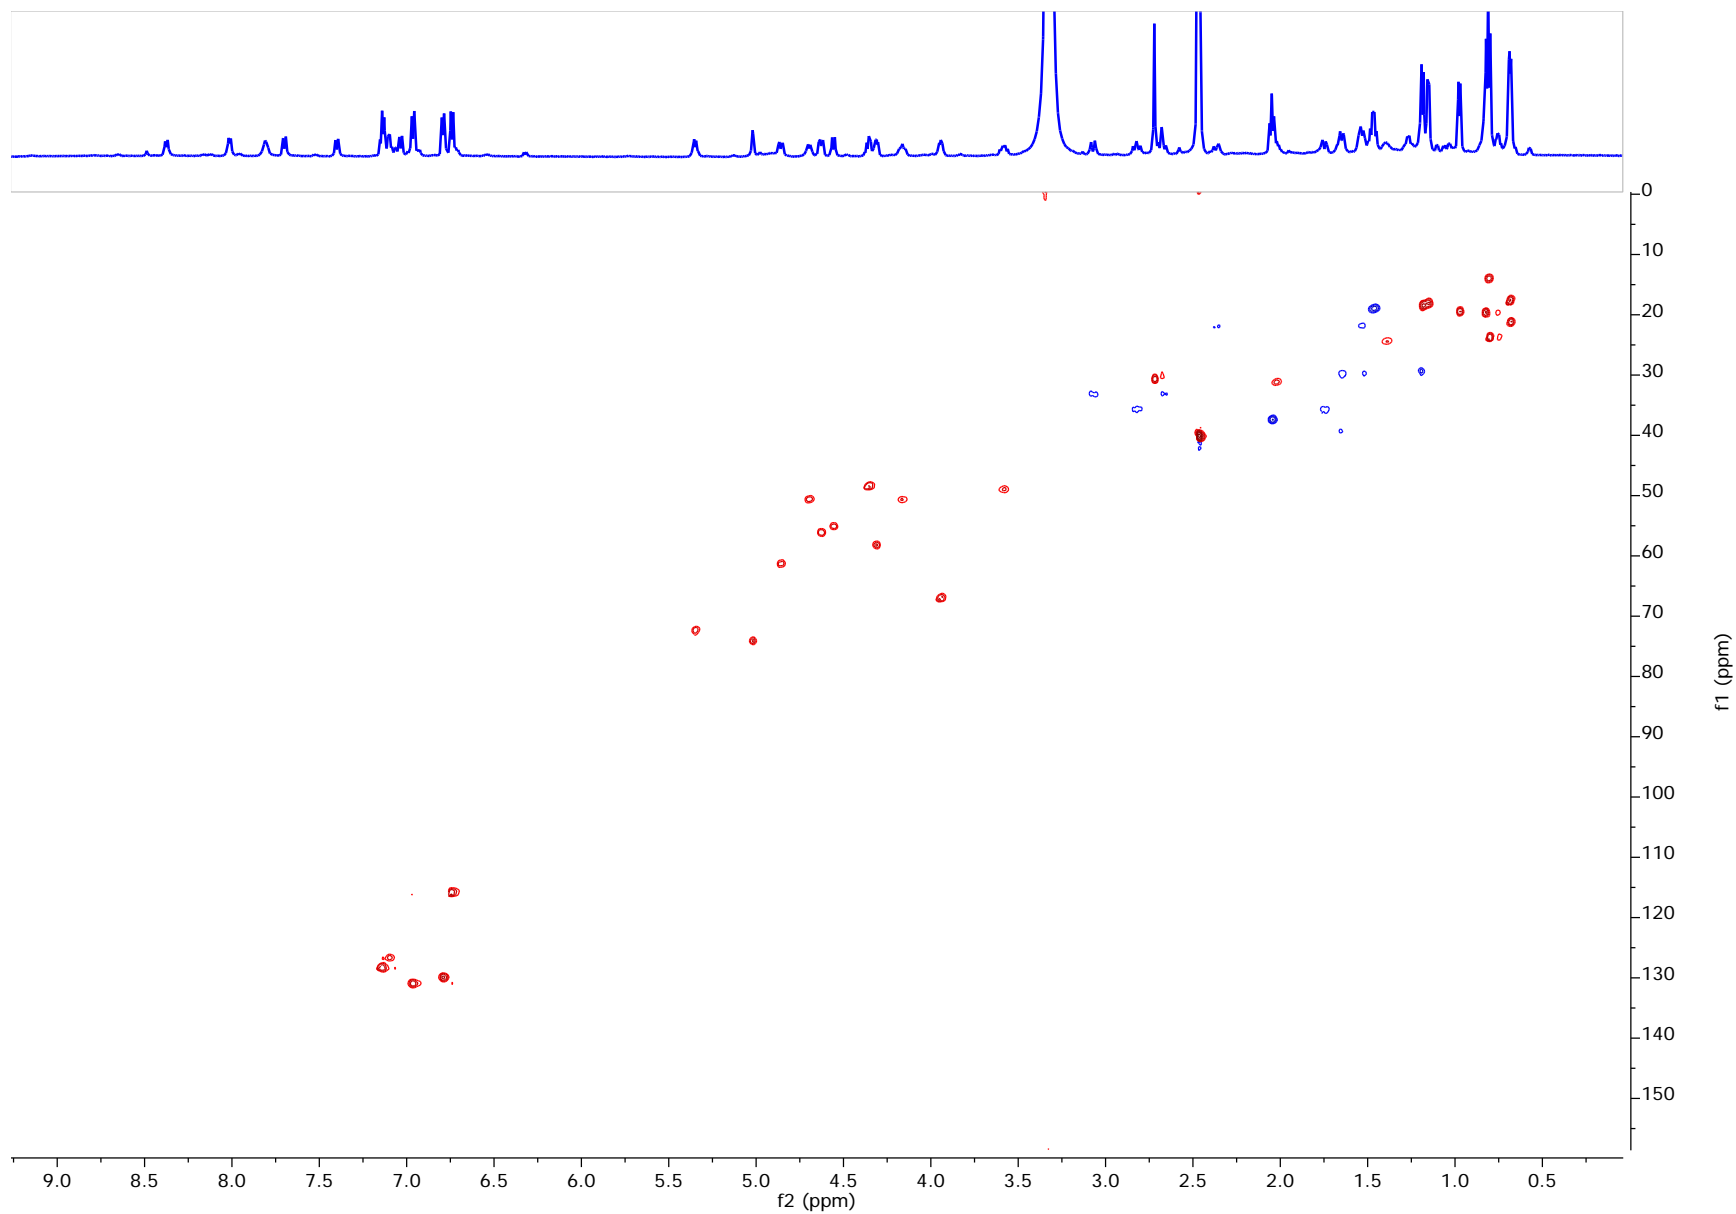

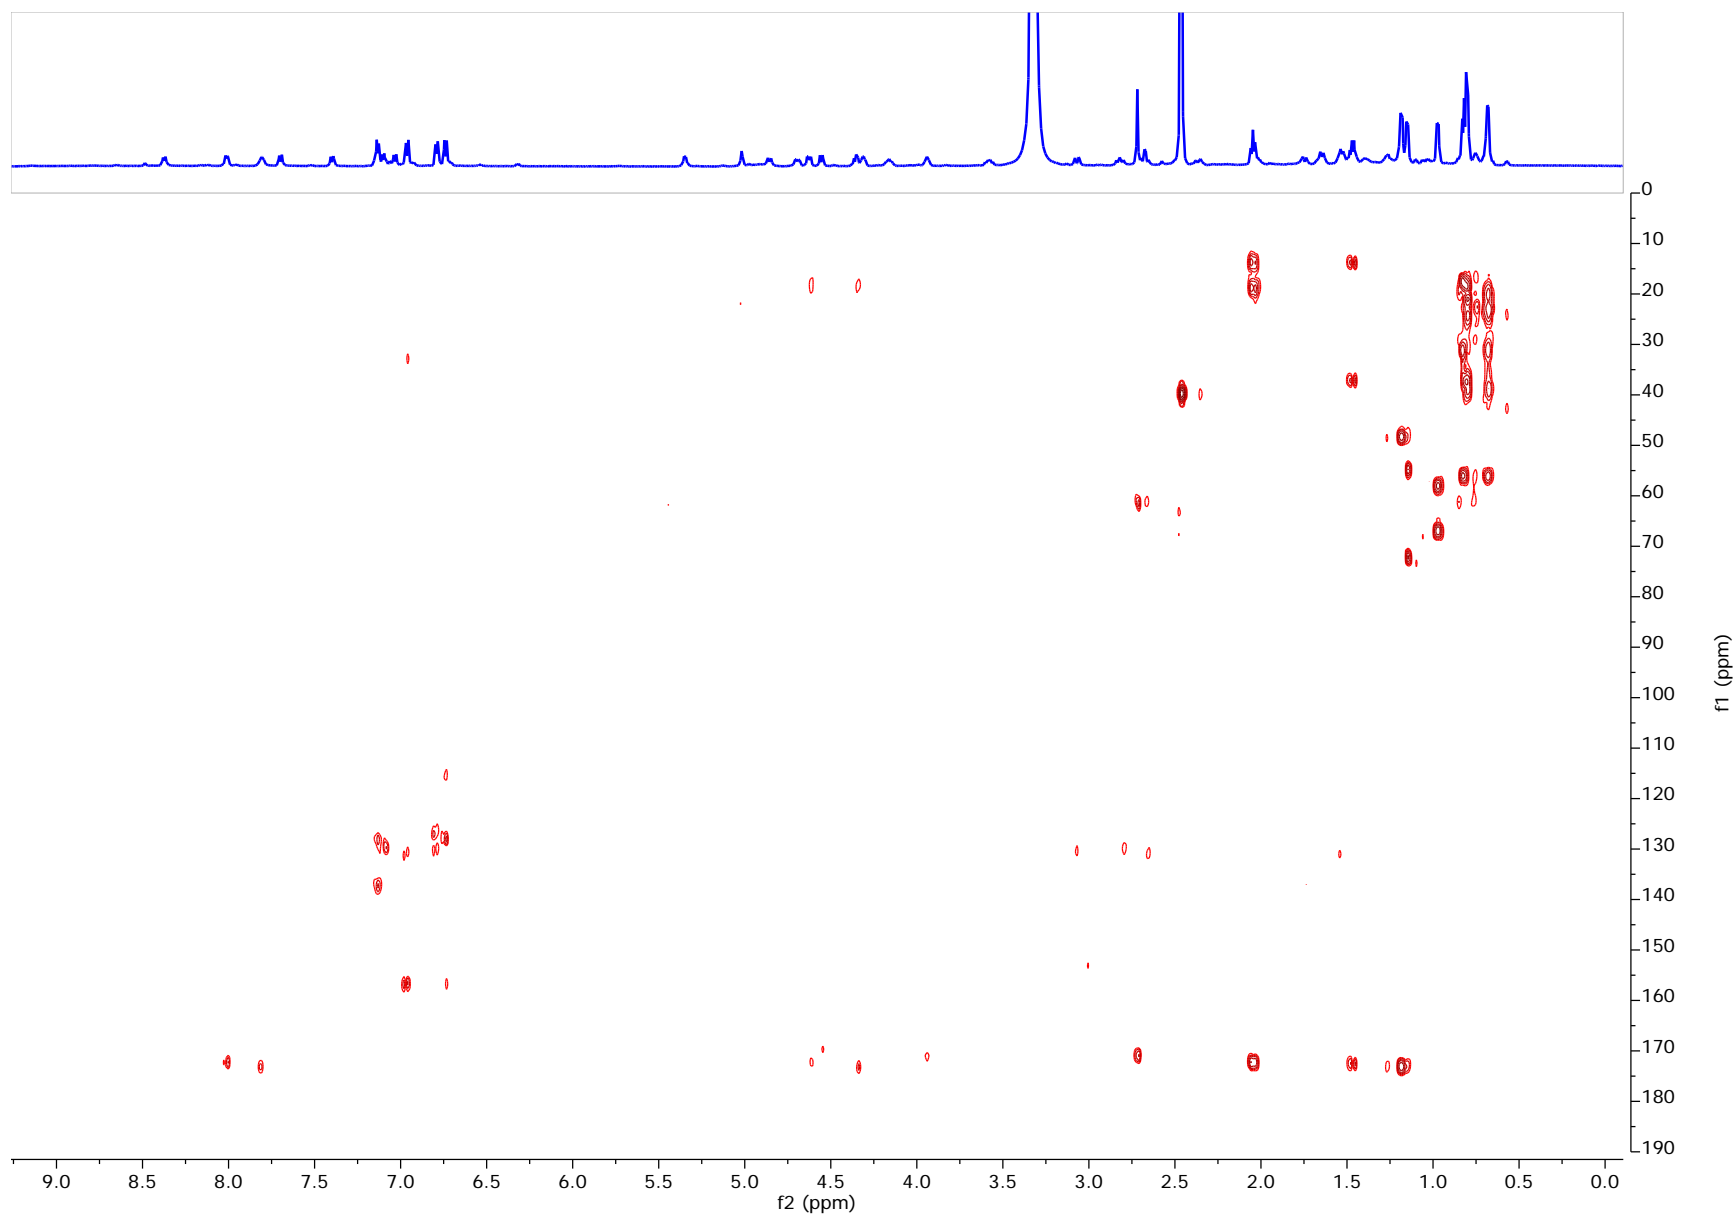

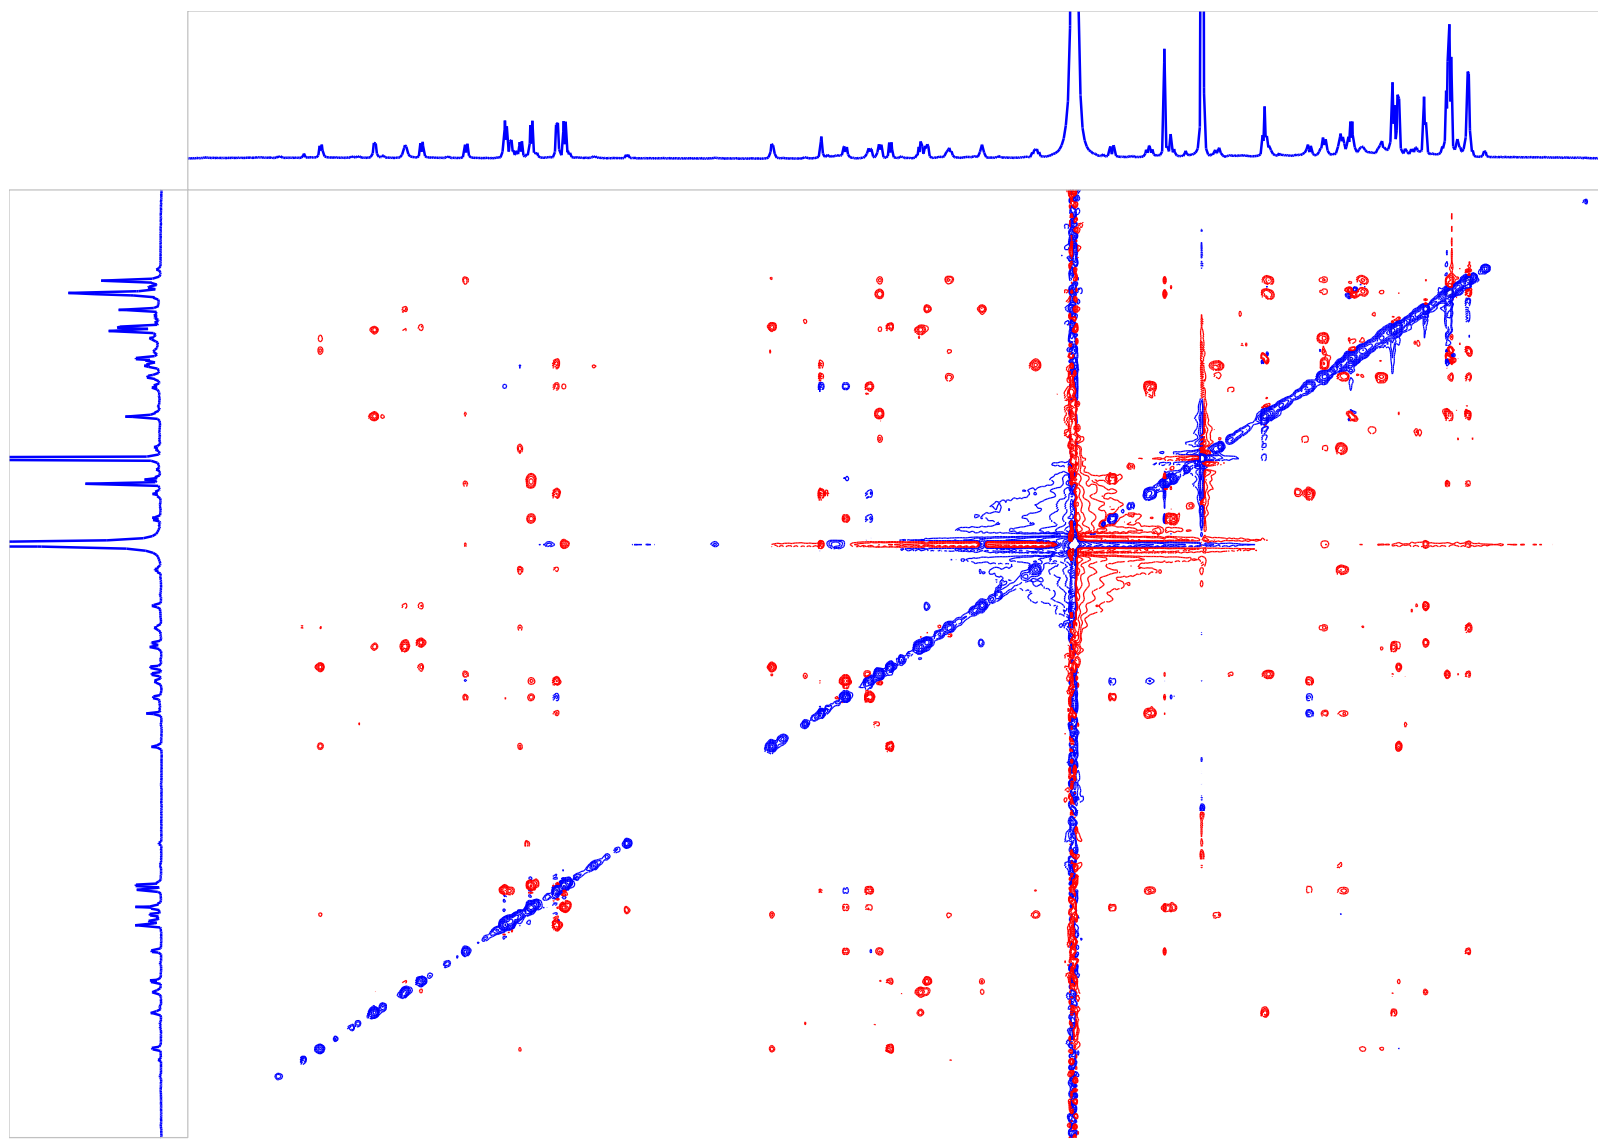

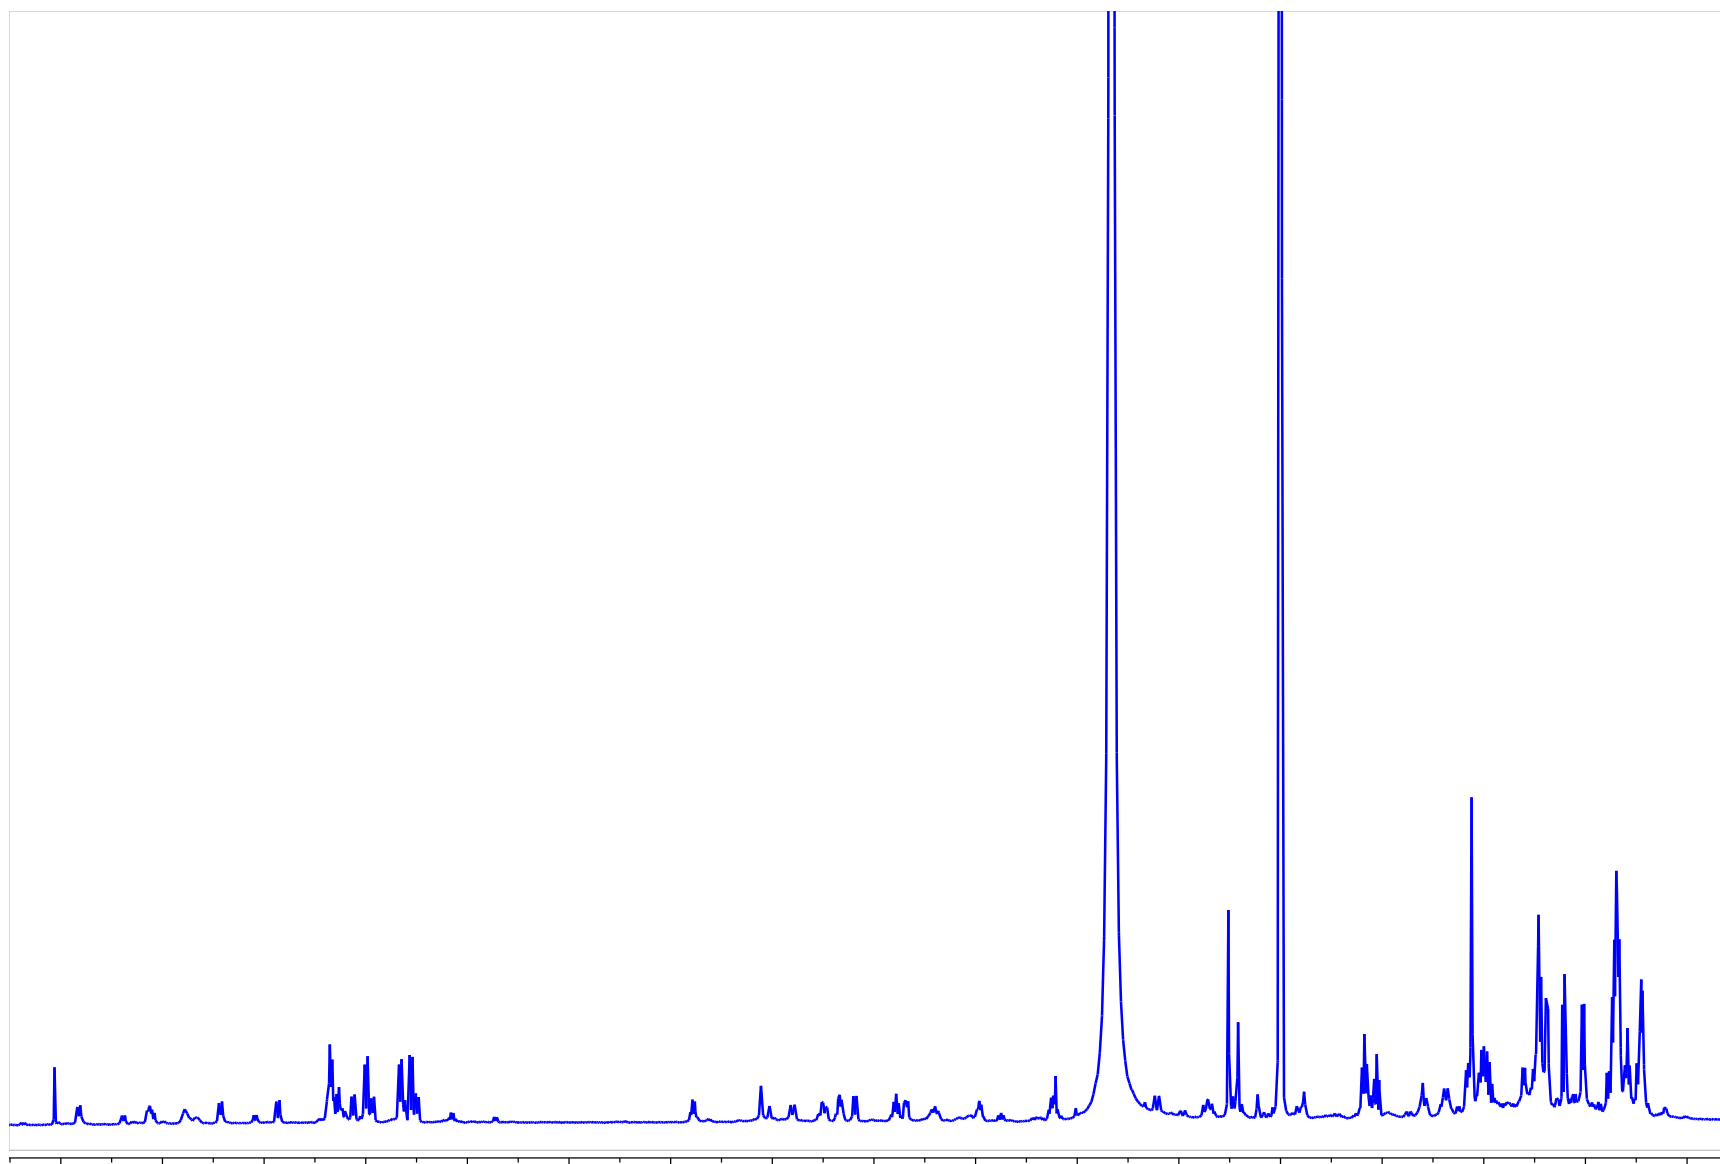

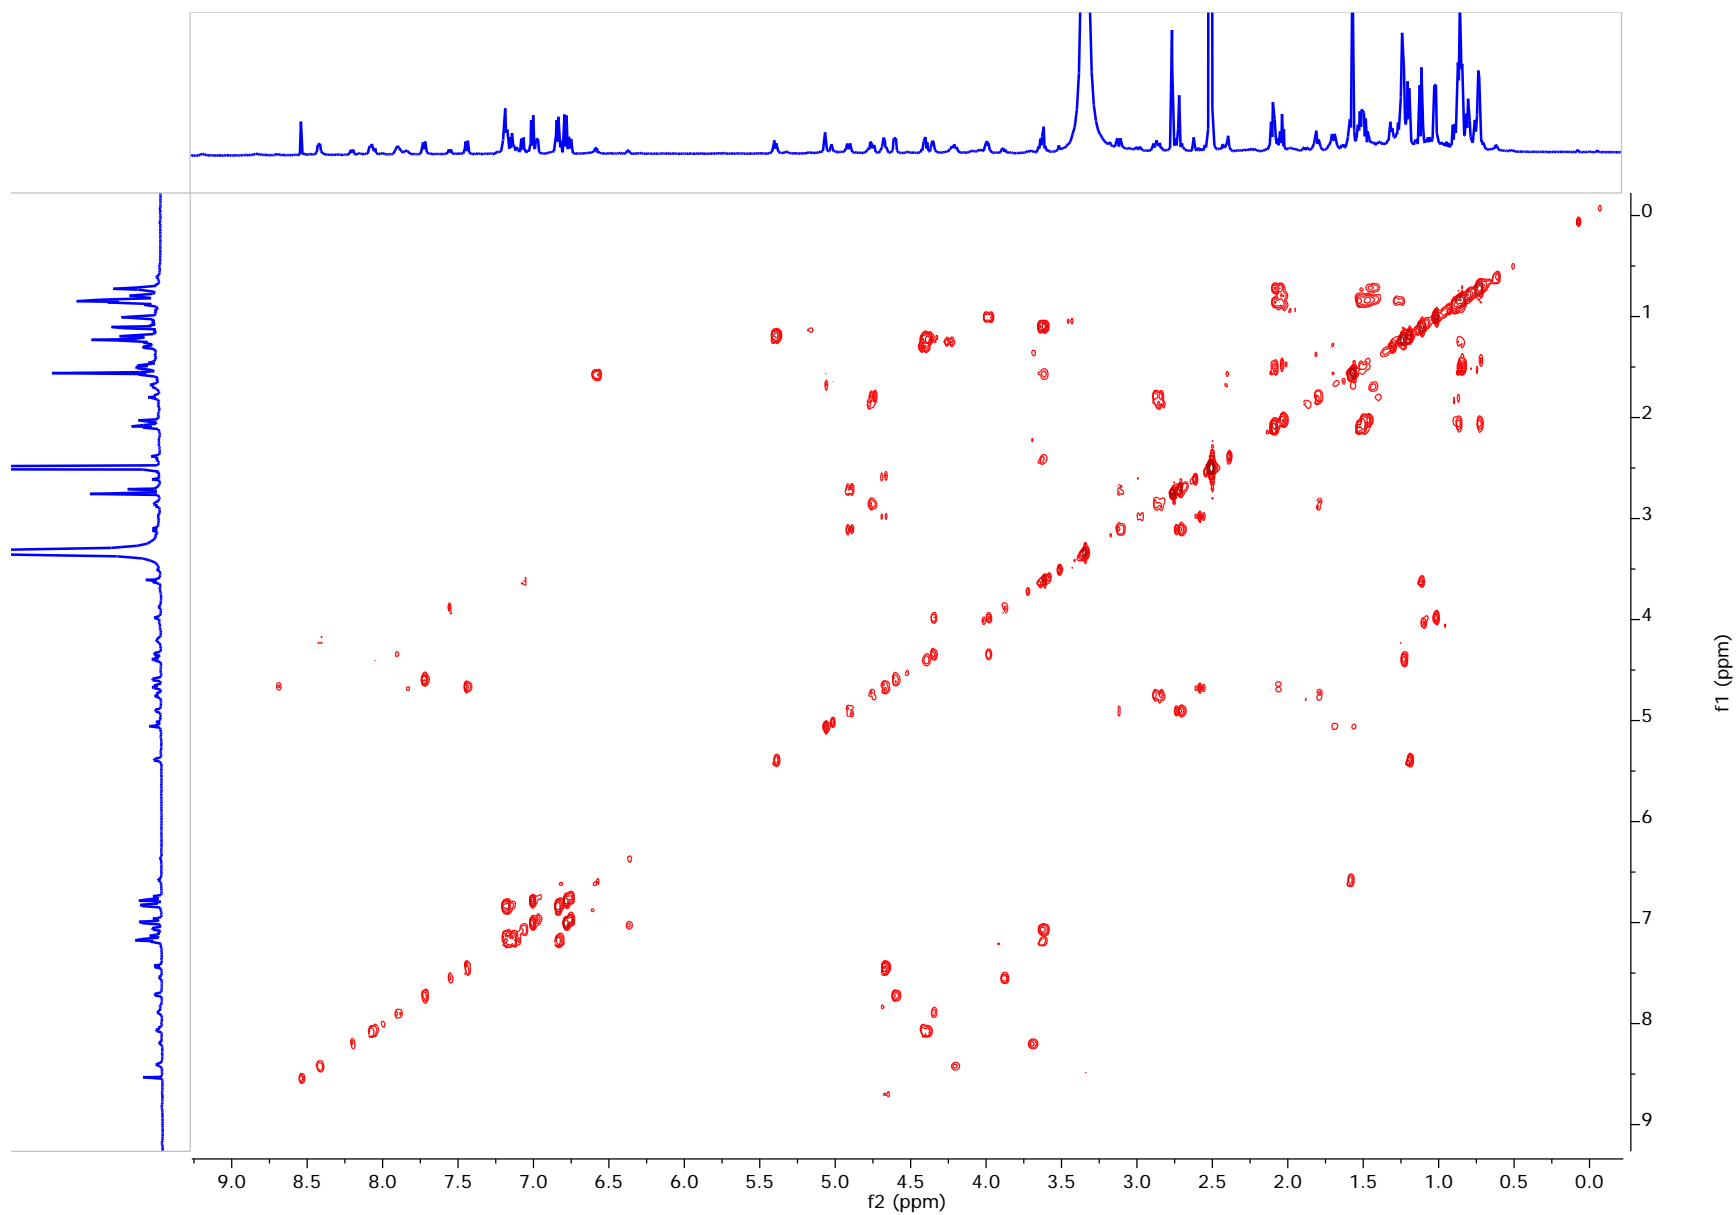



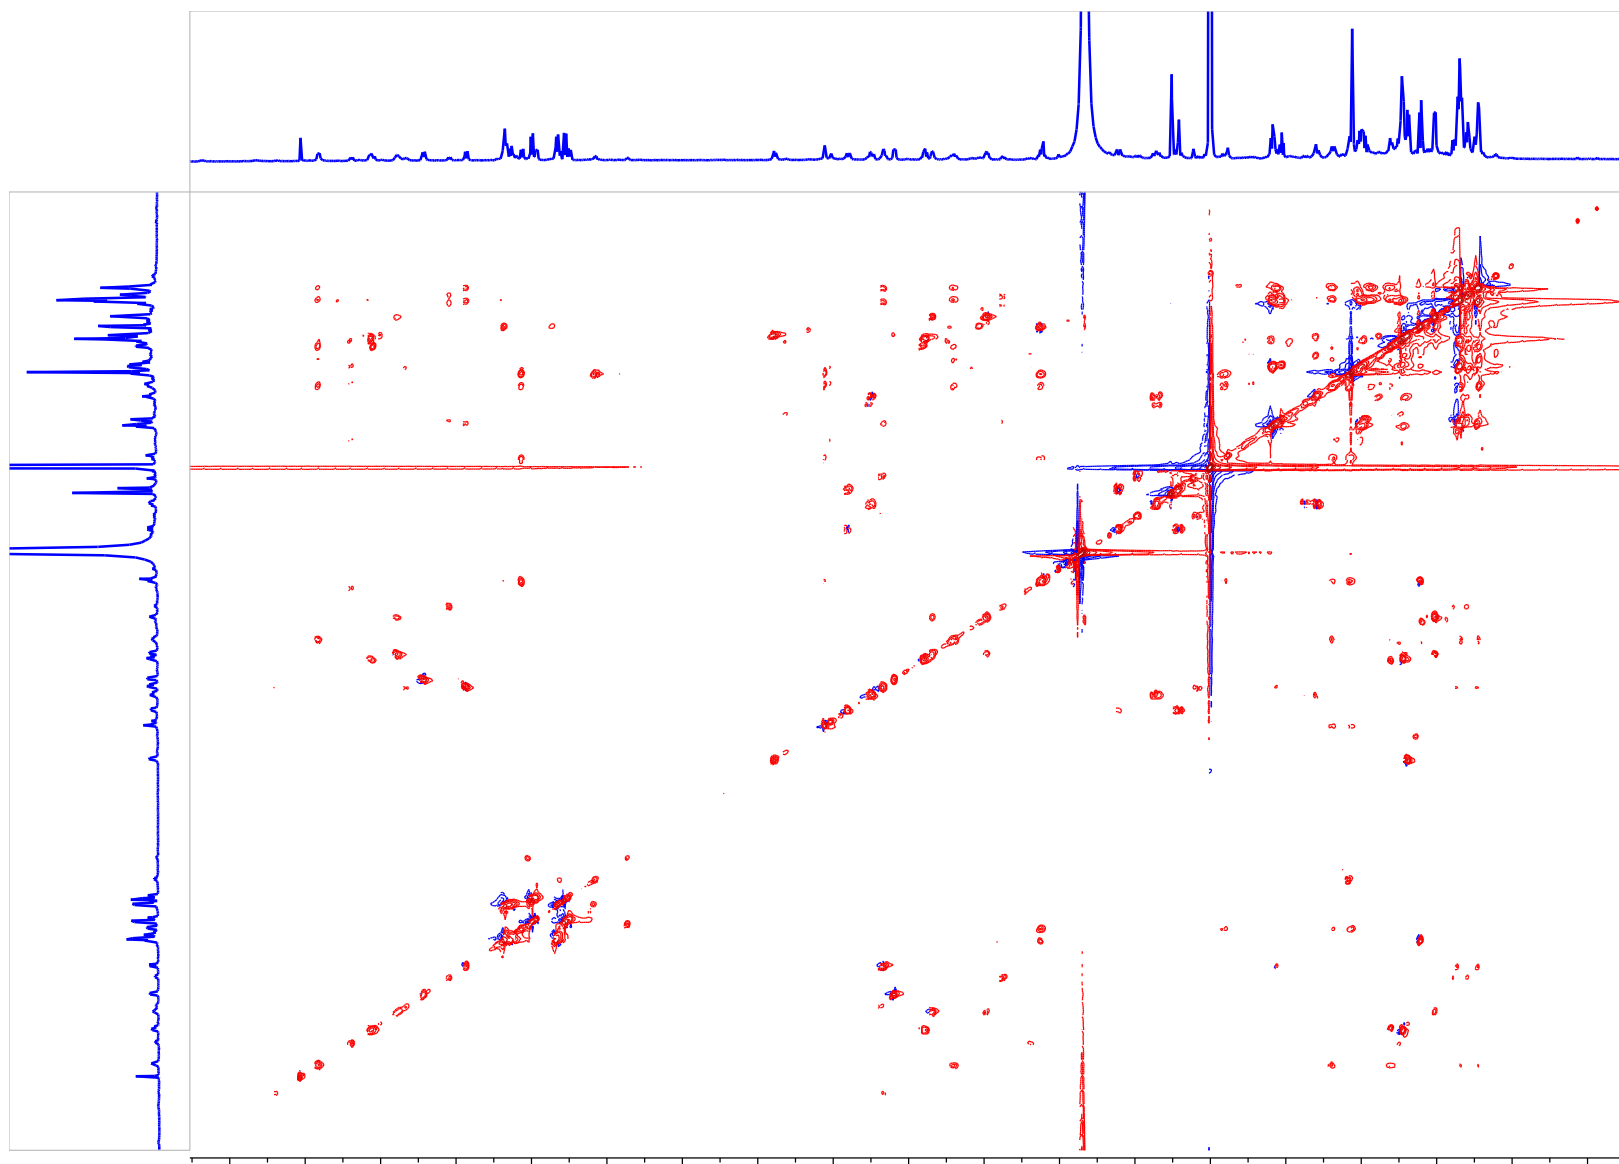

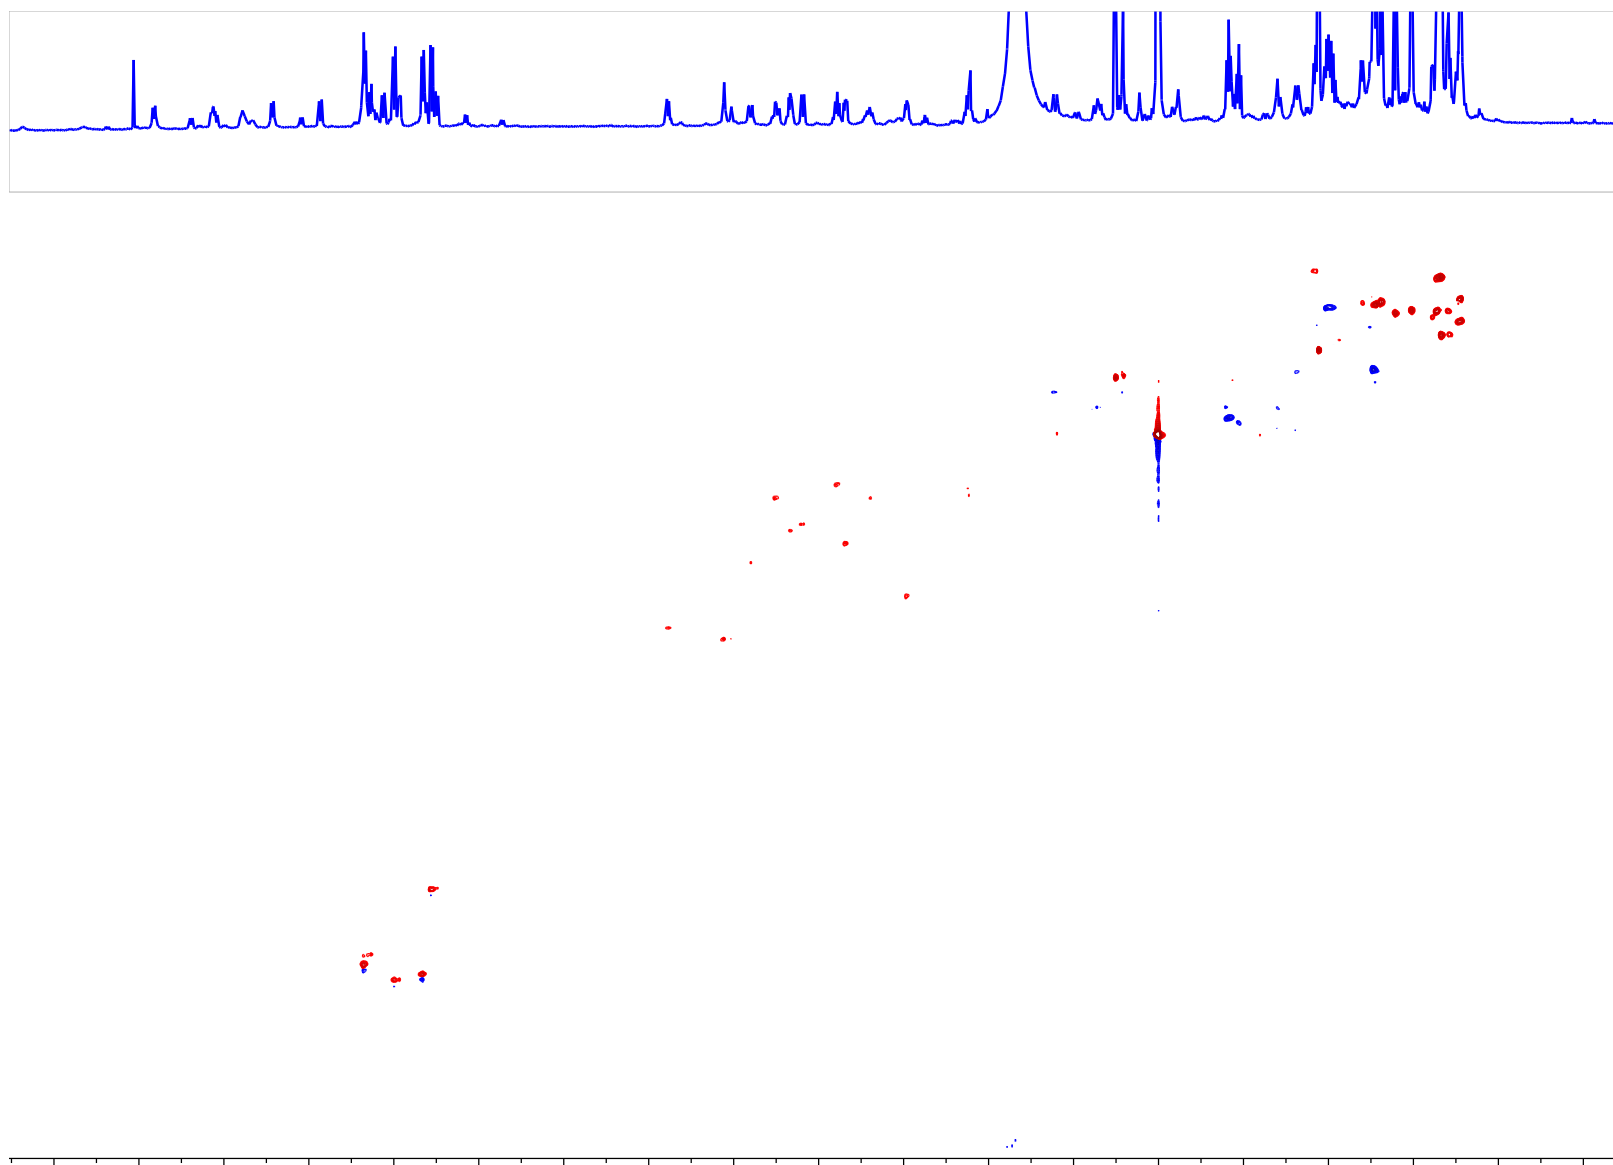

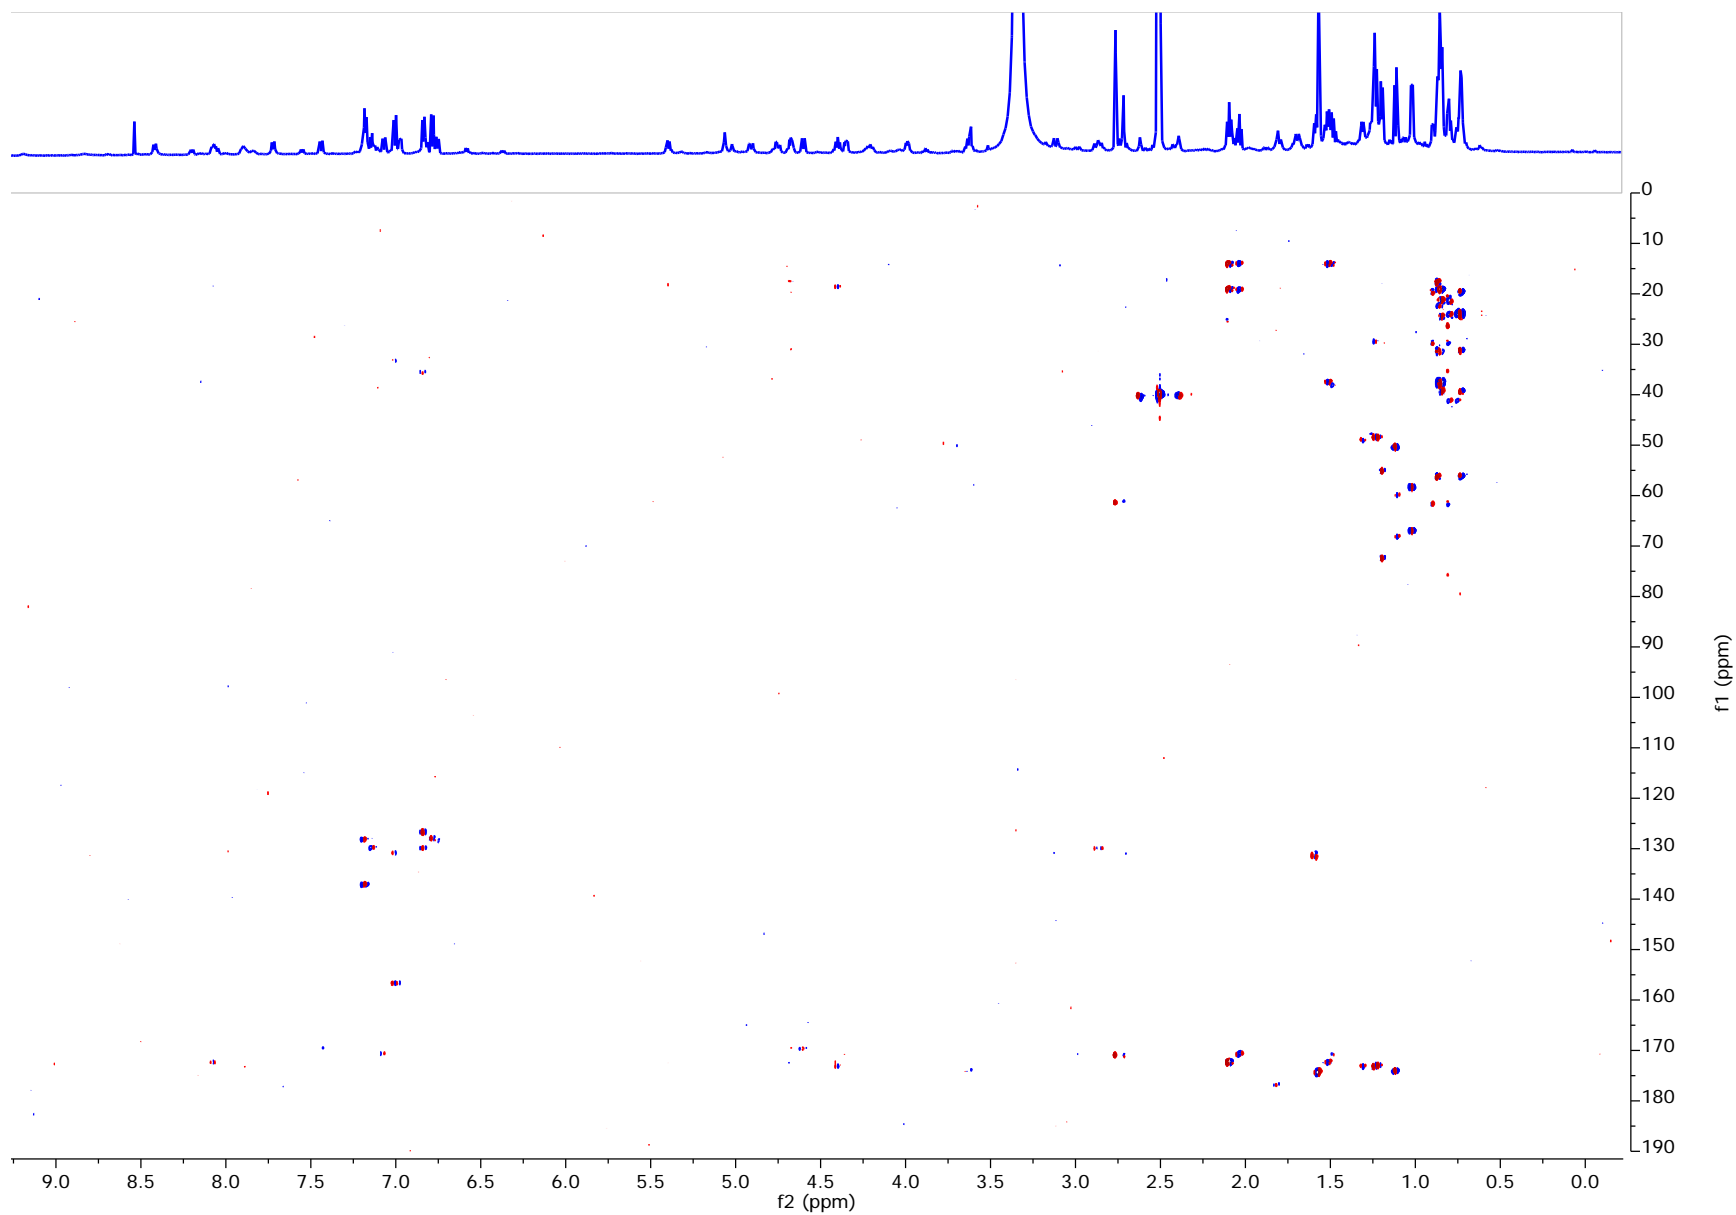

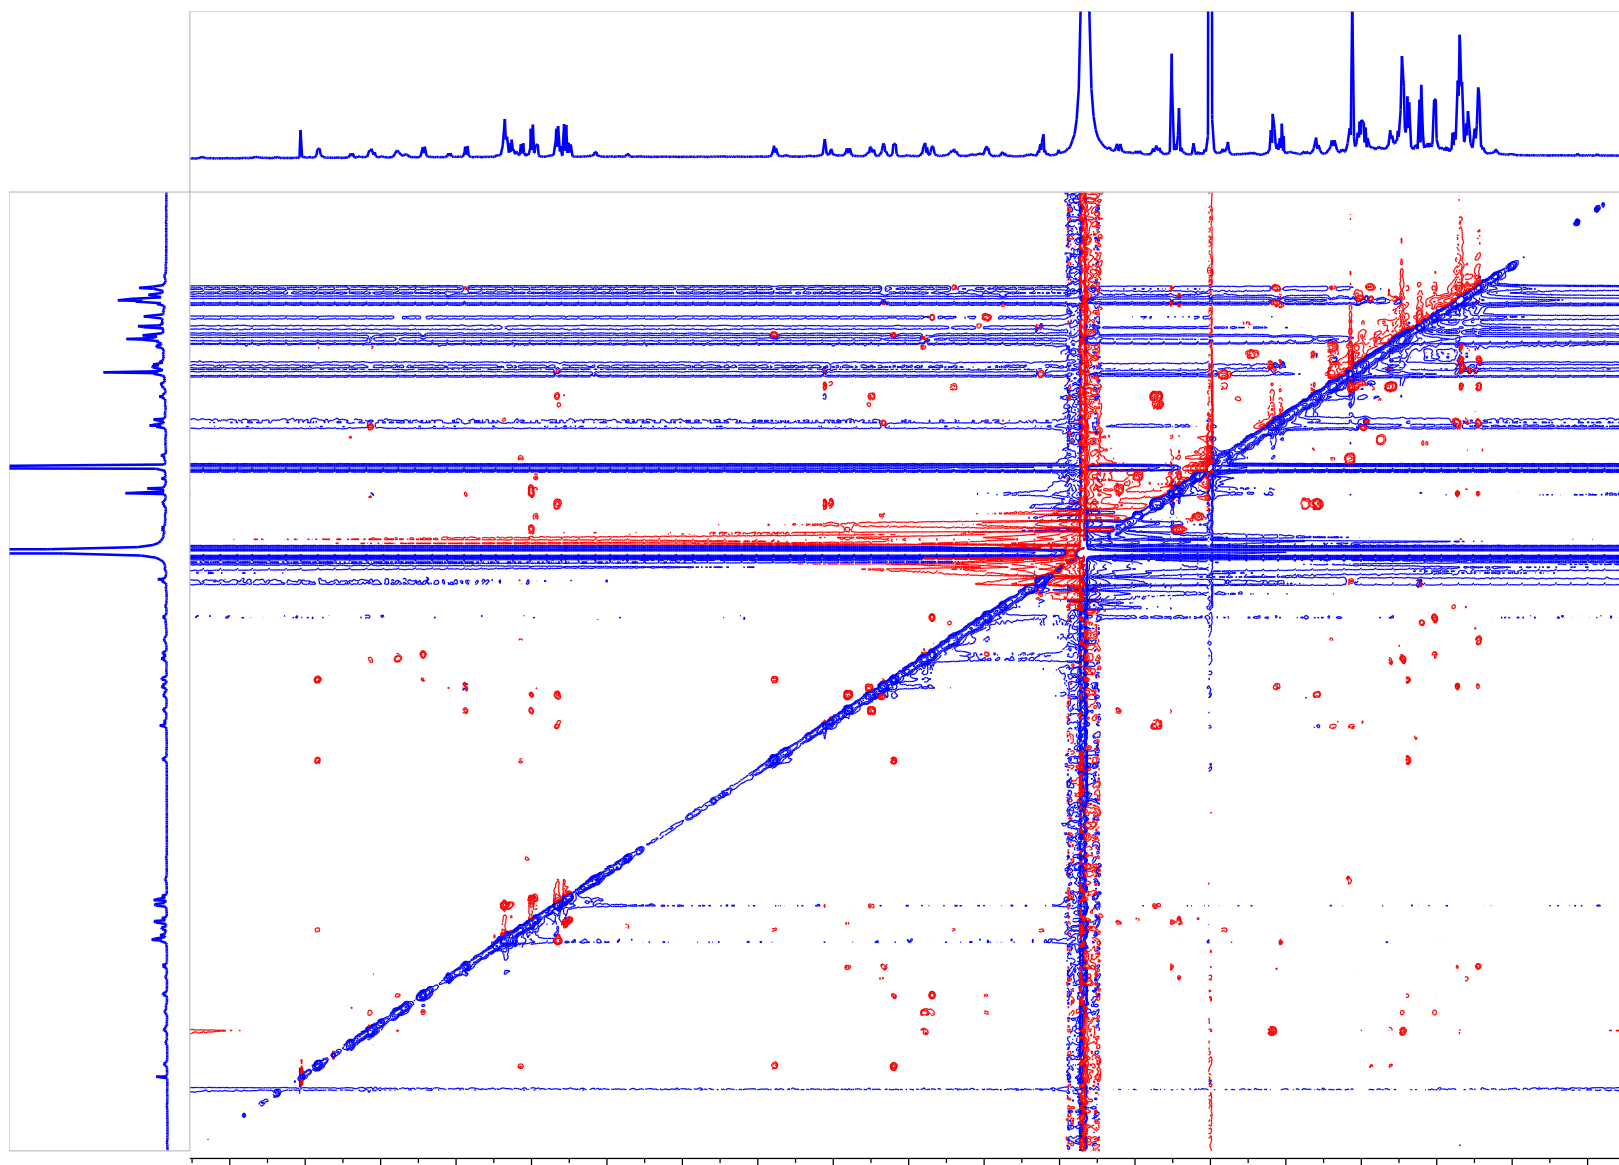

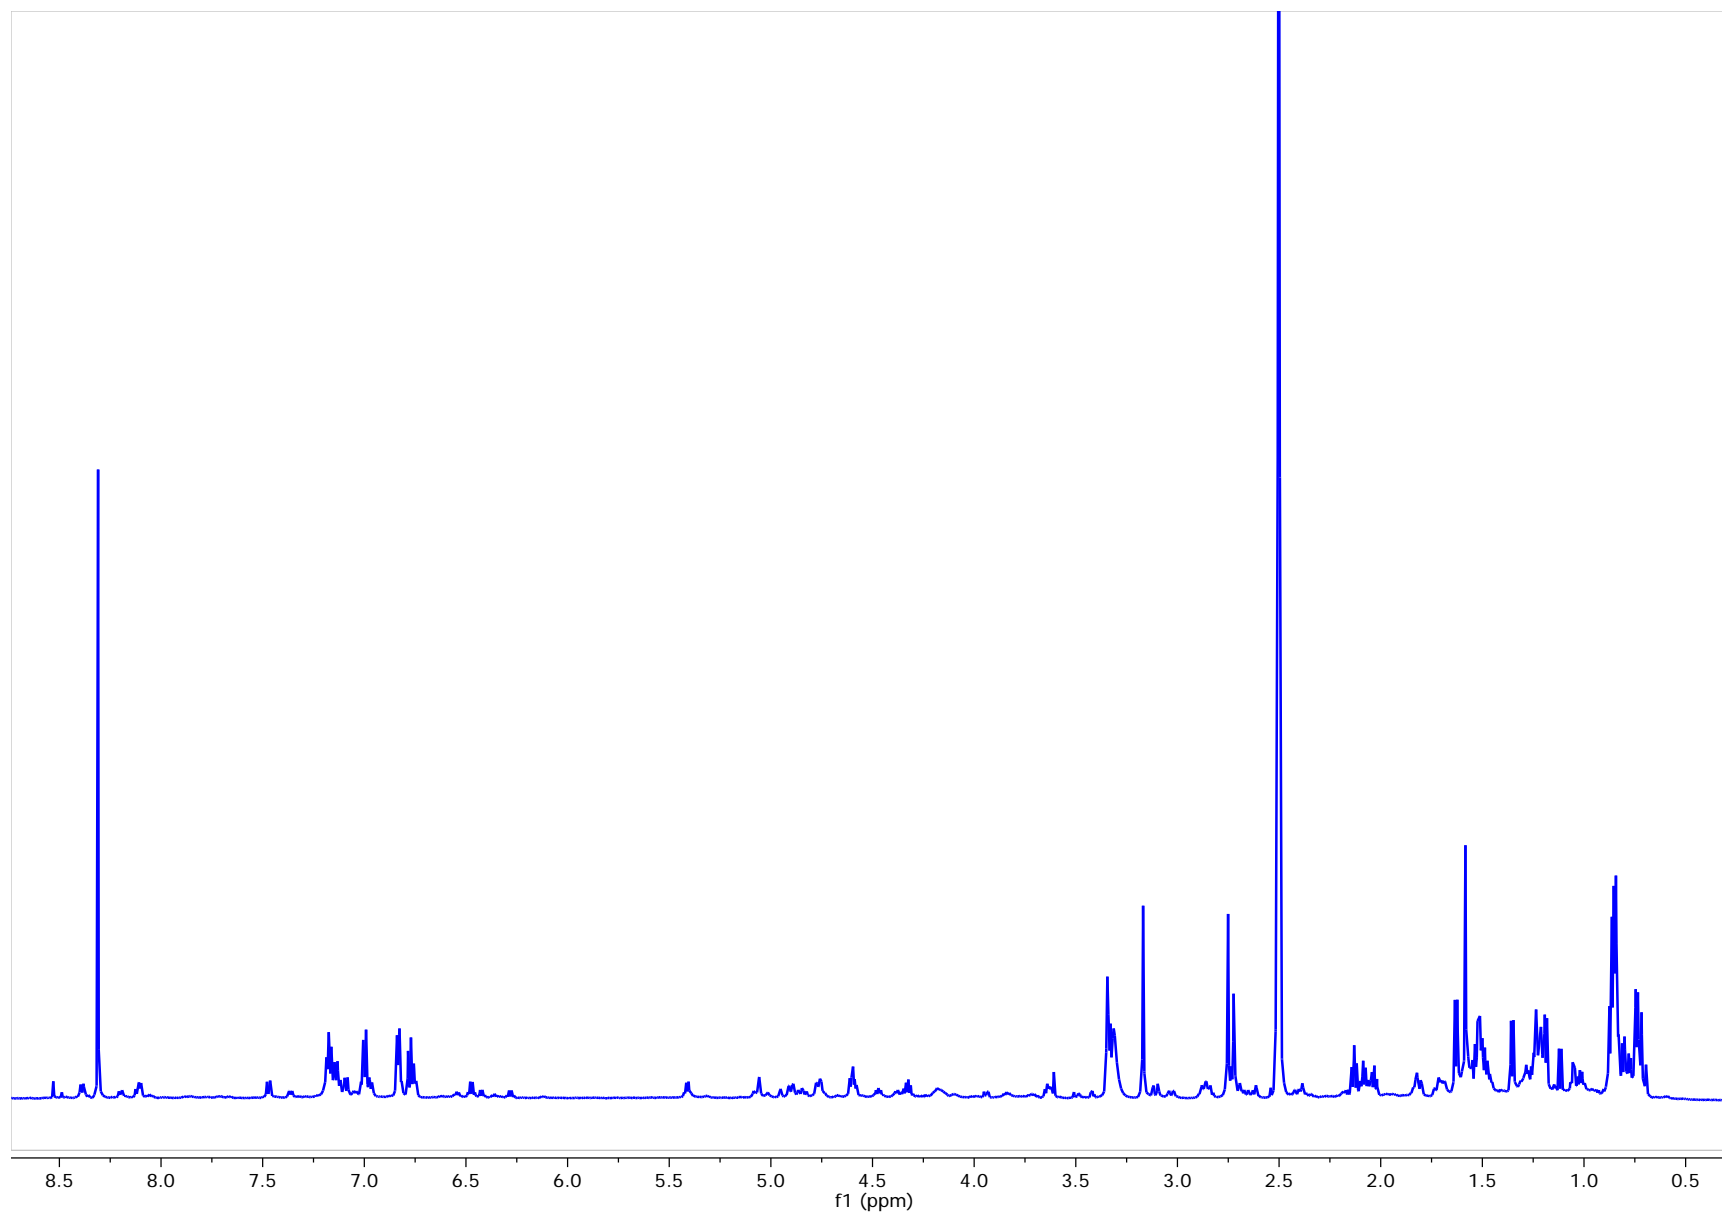

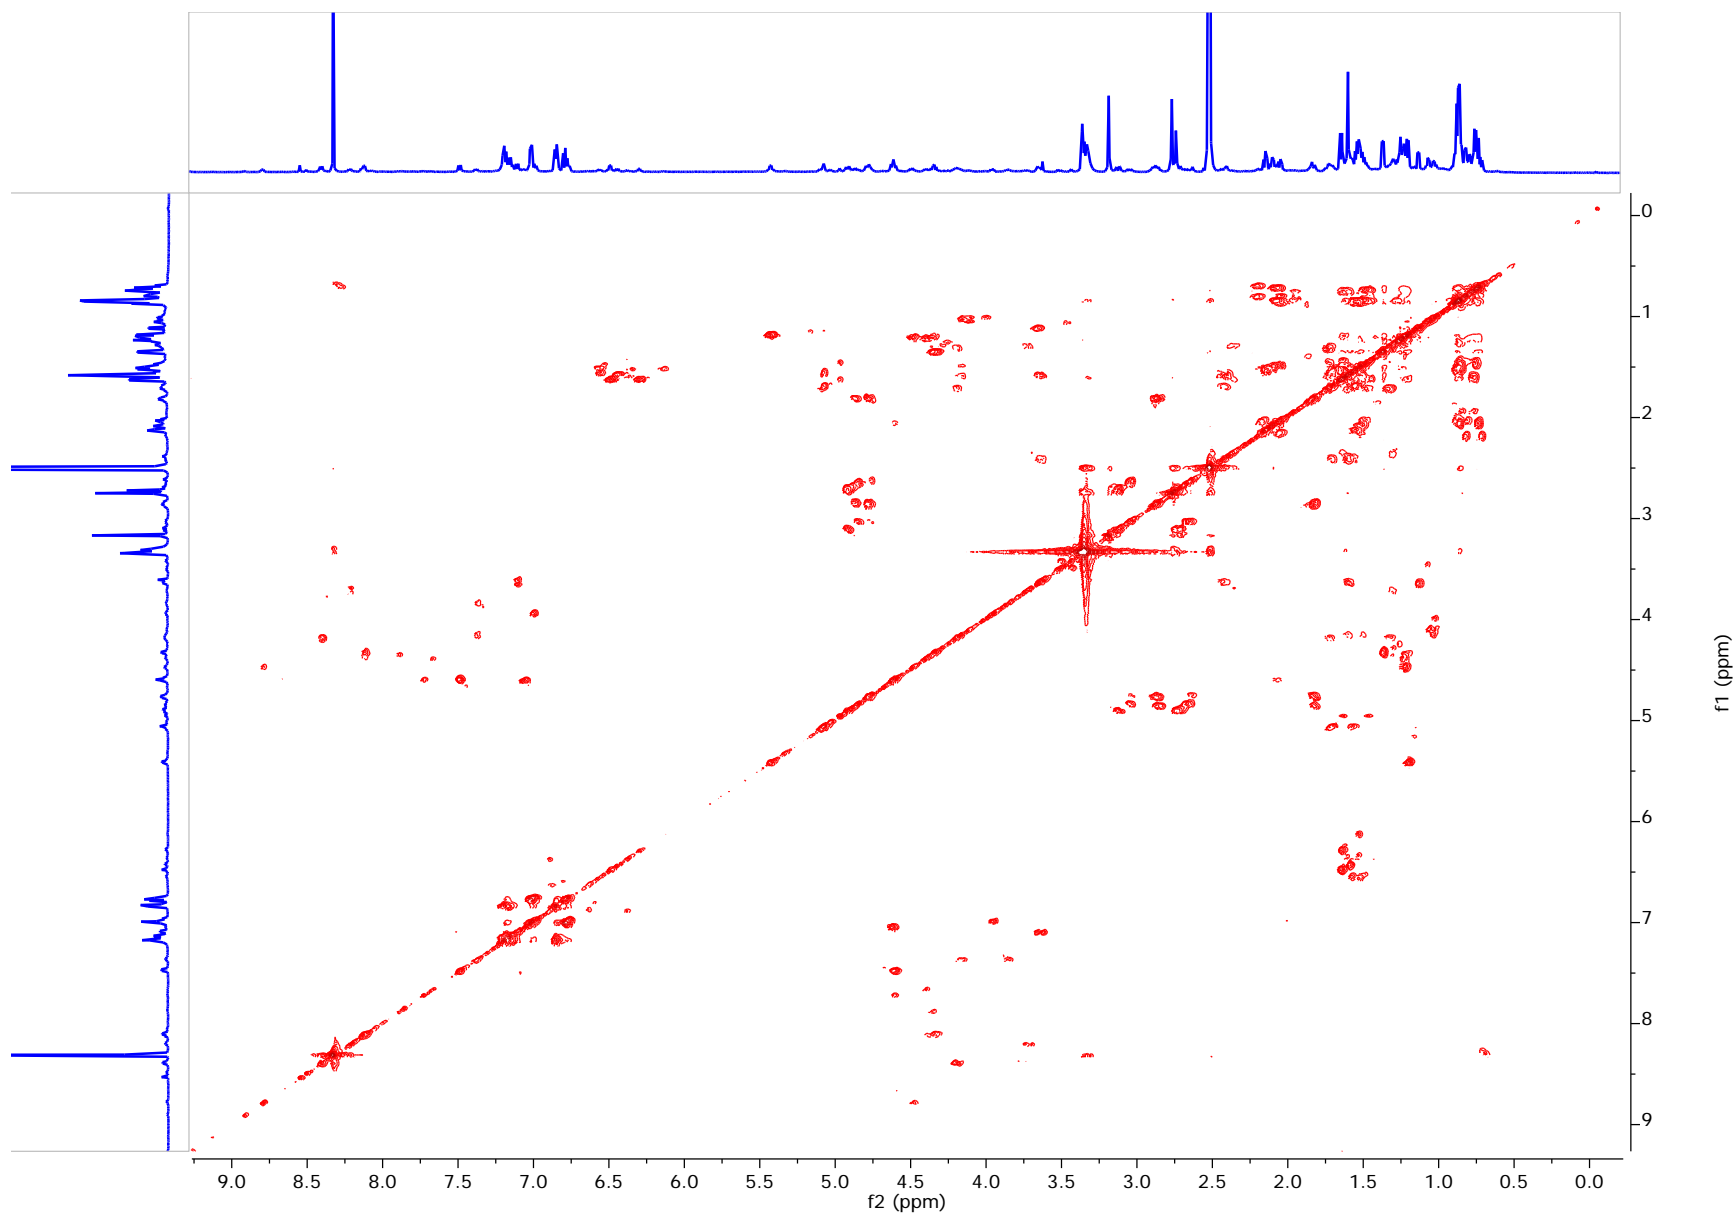

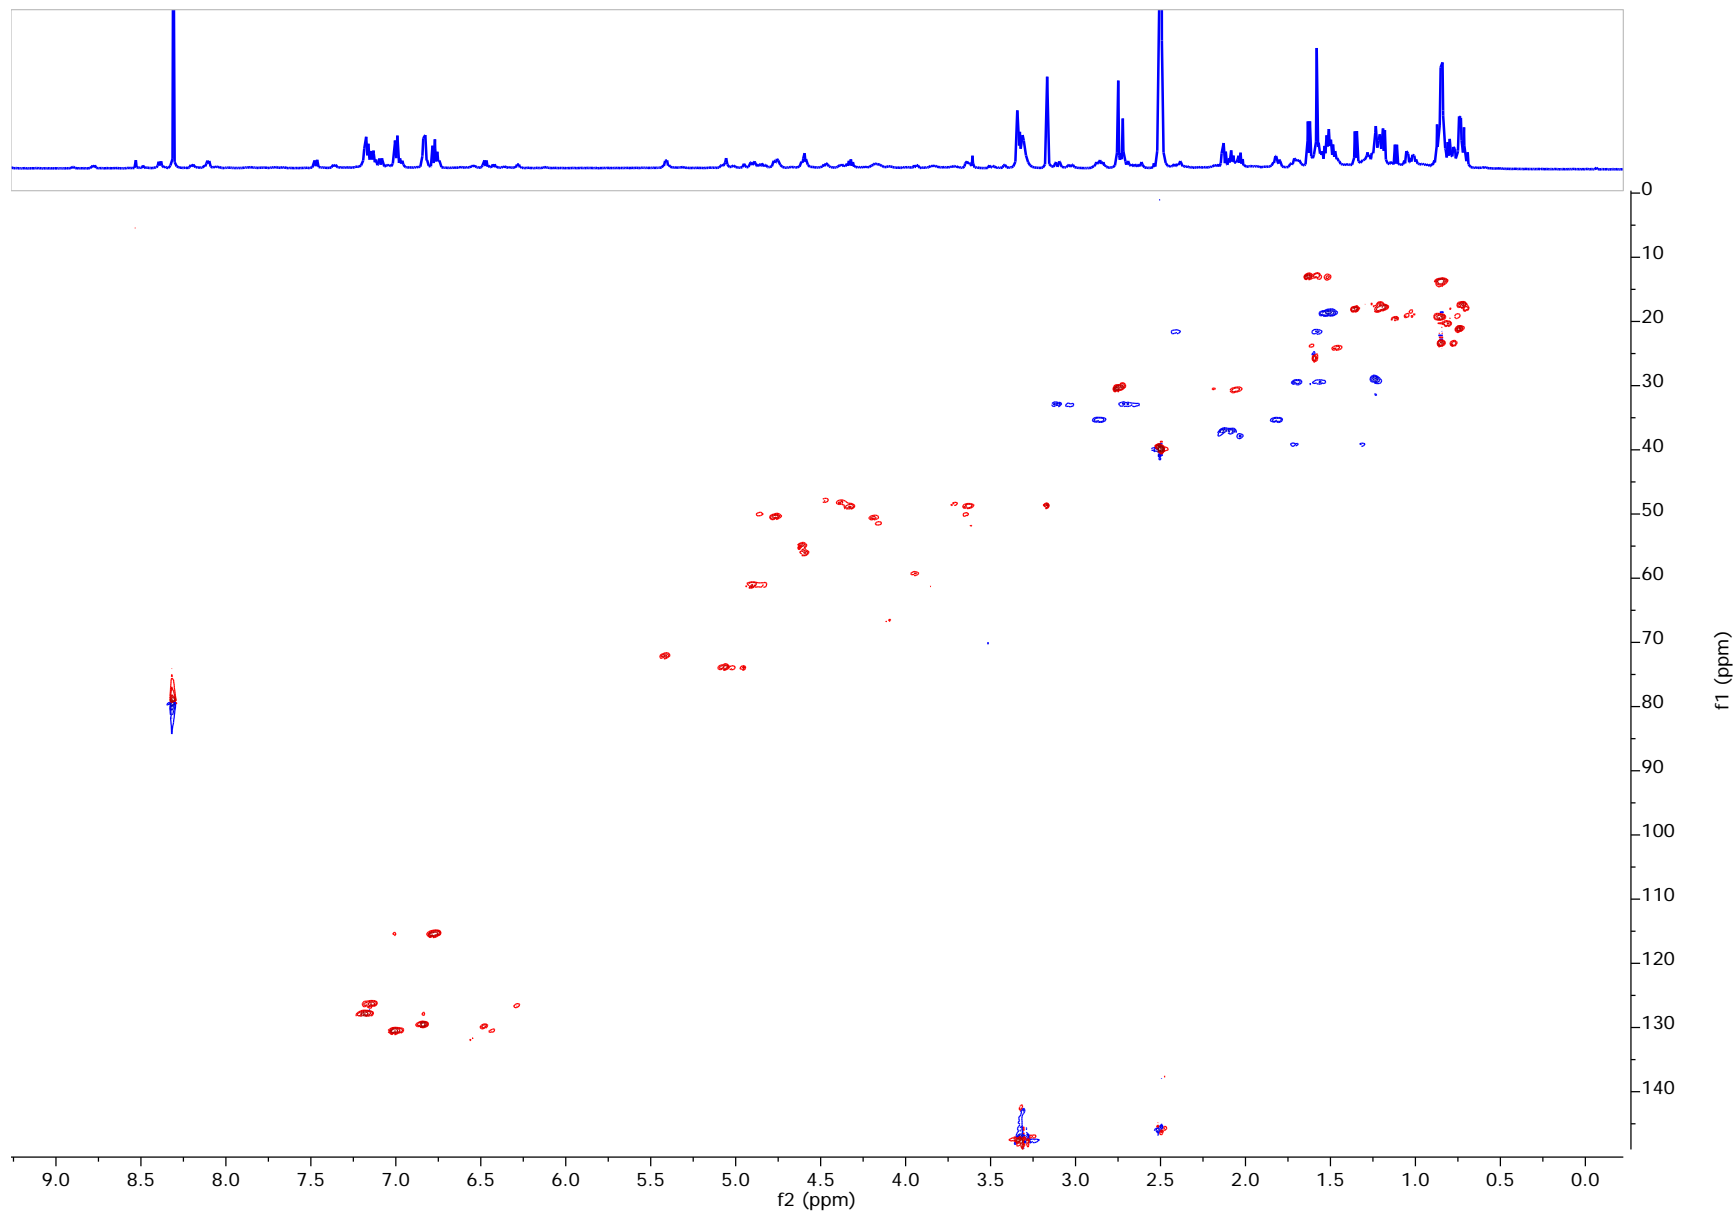

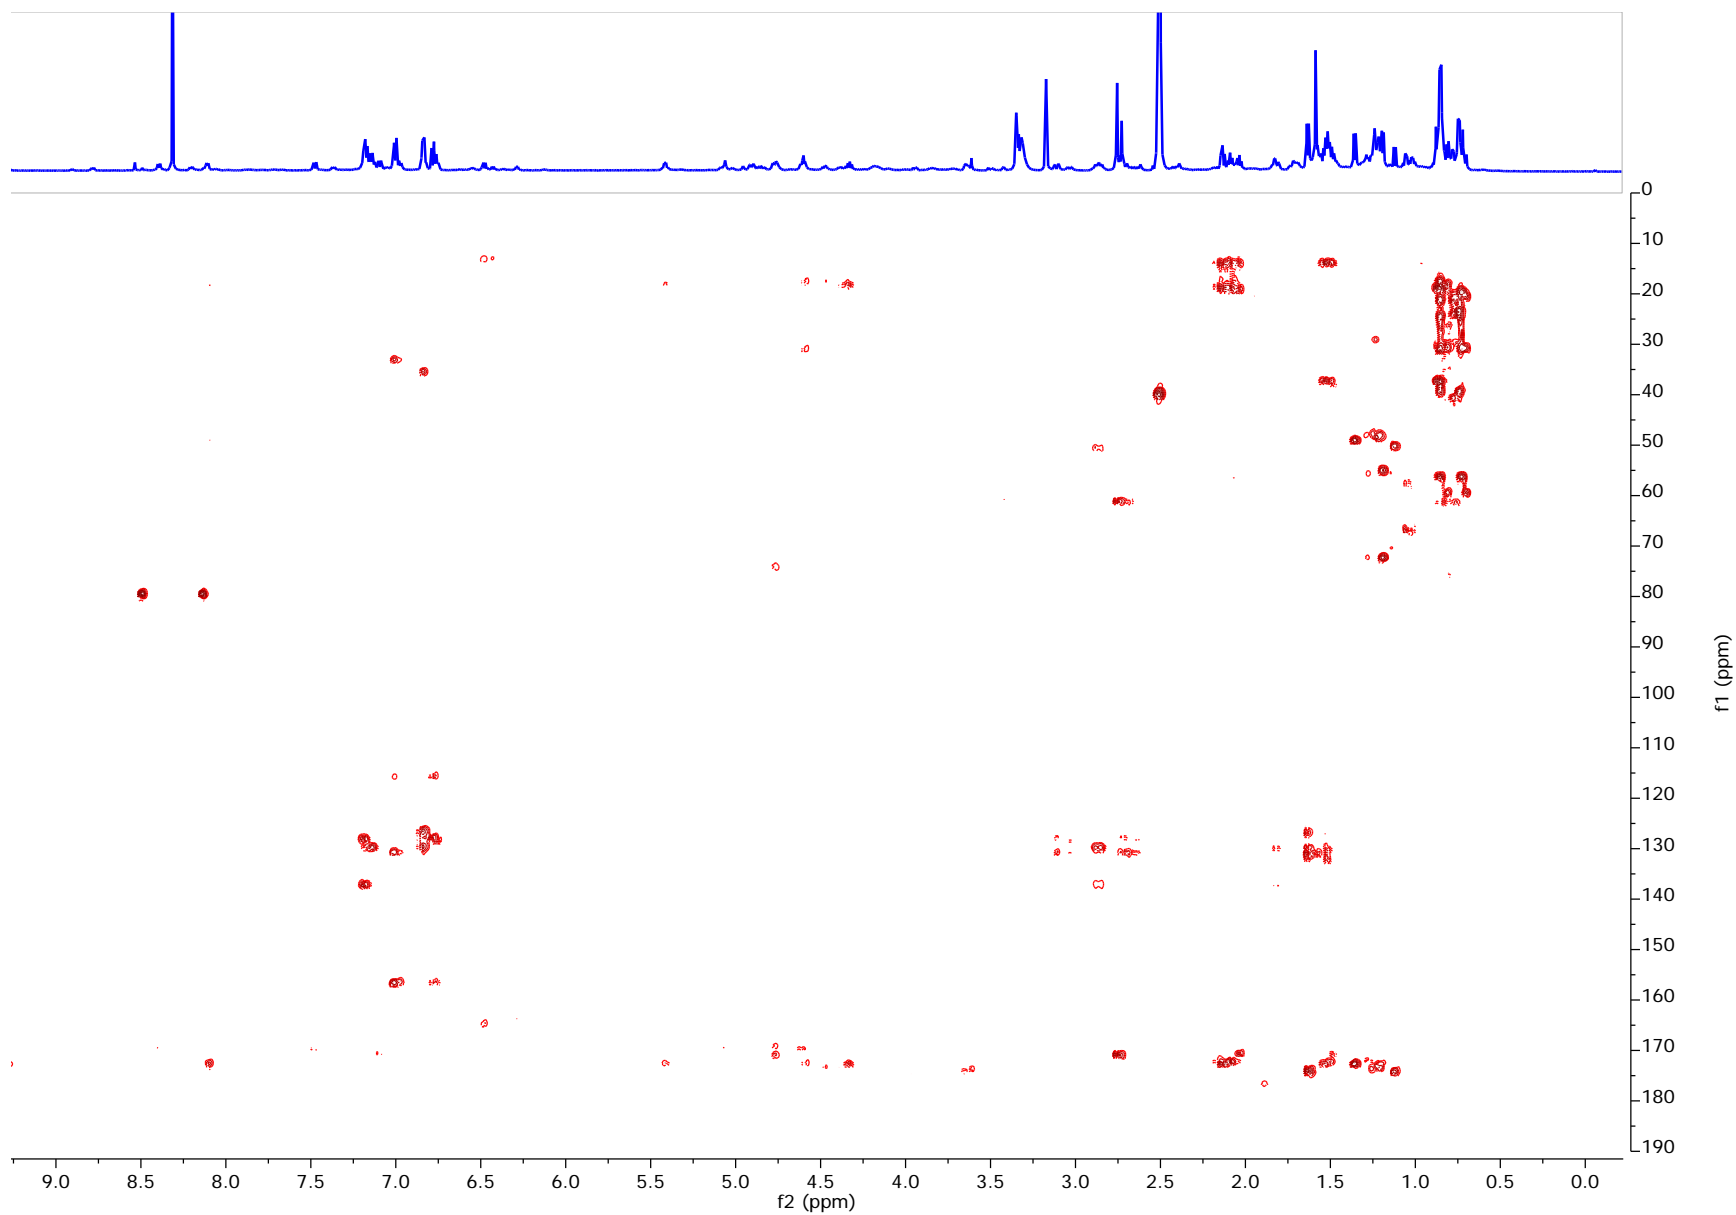



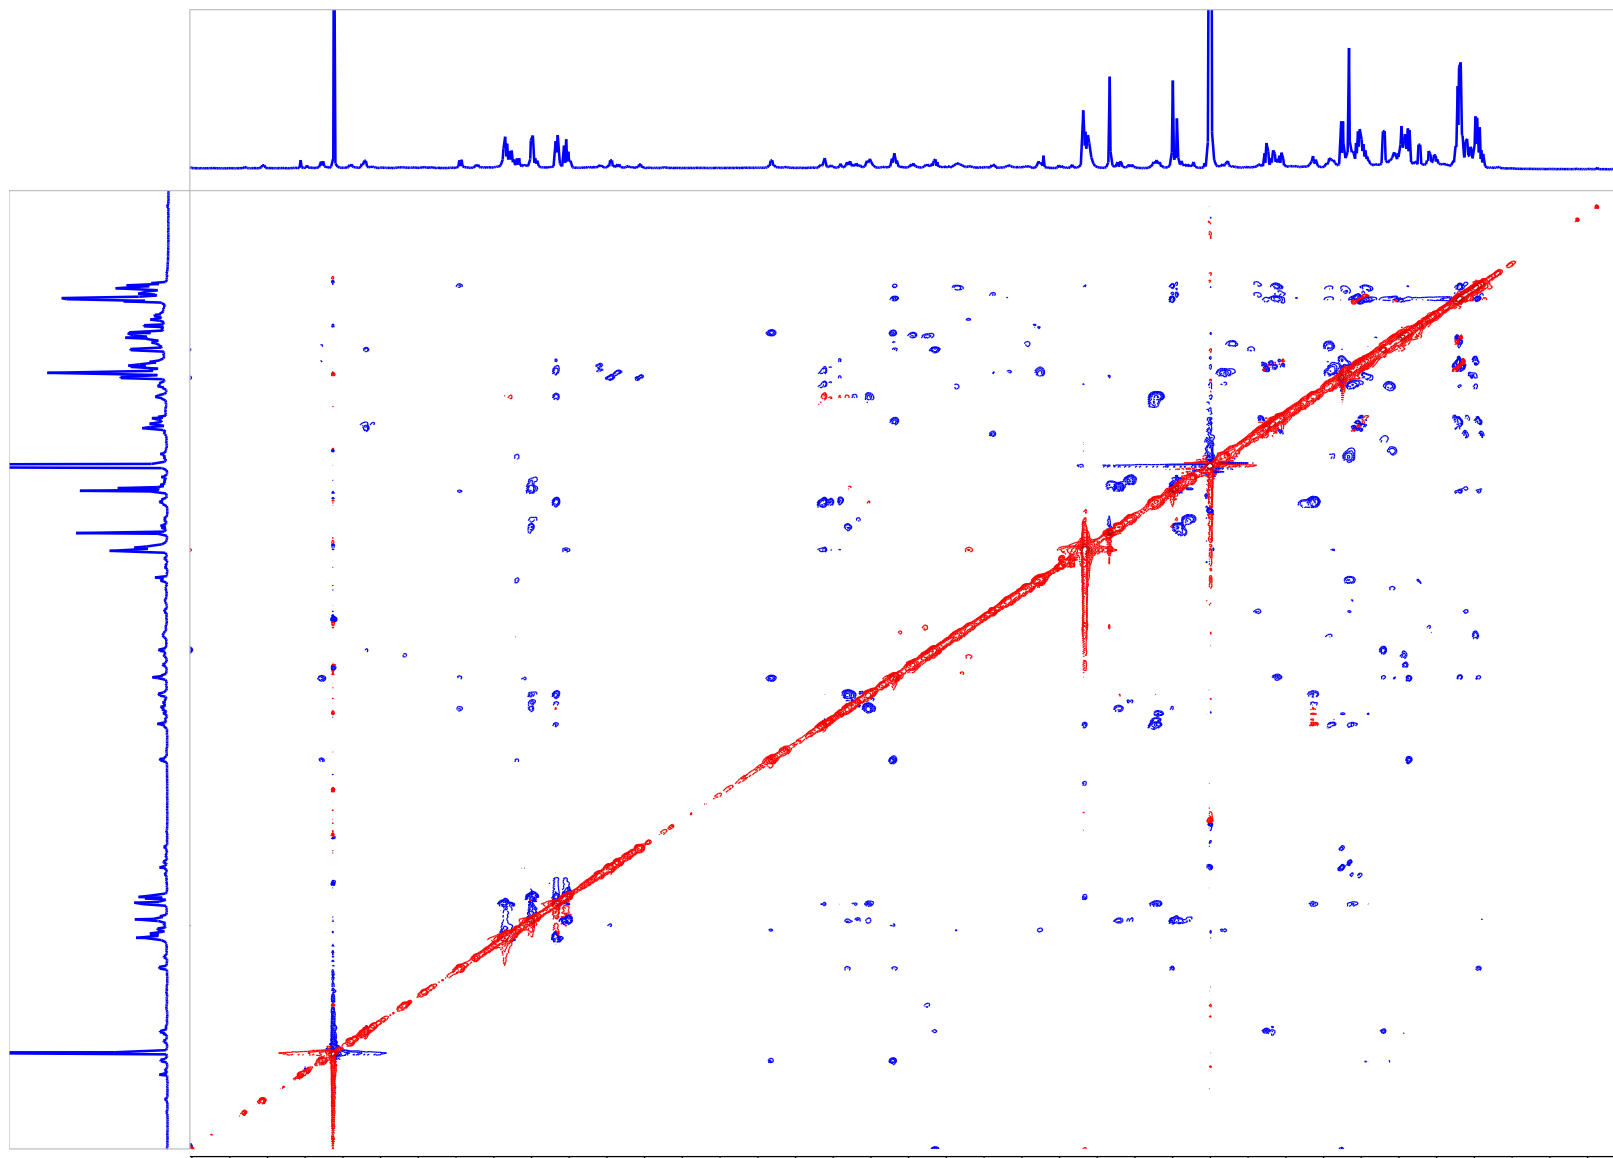

$^1\text{H}$  NMR Spectrum of Molassamide (**4**) in  $\text{DMSO-}d_6$ , 600 MHz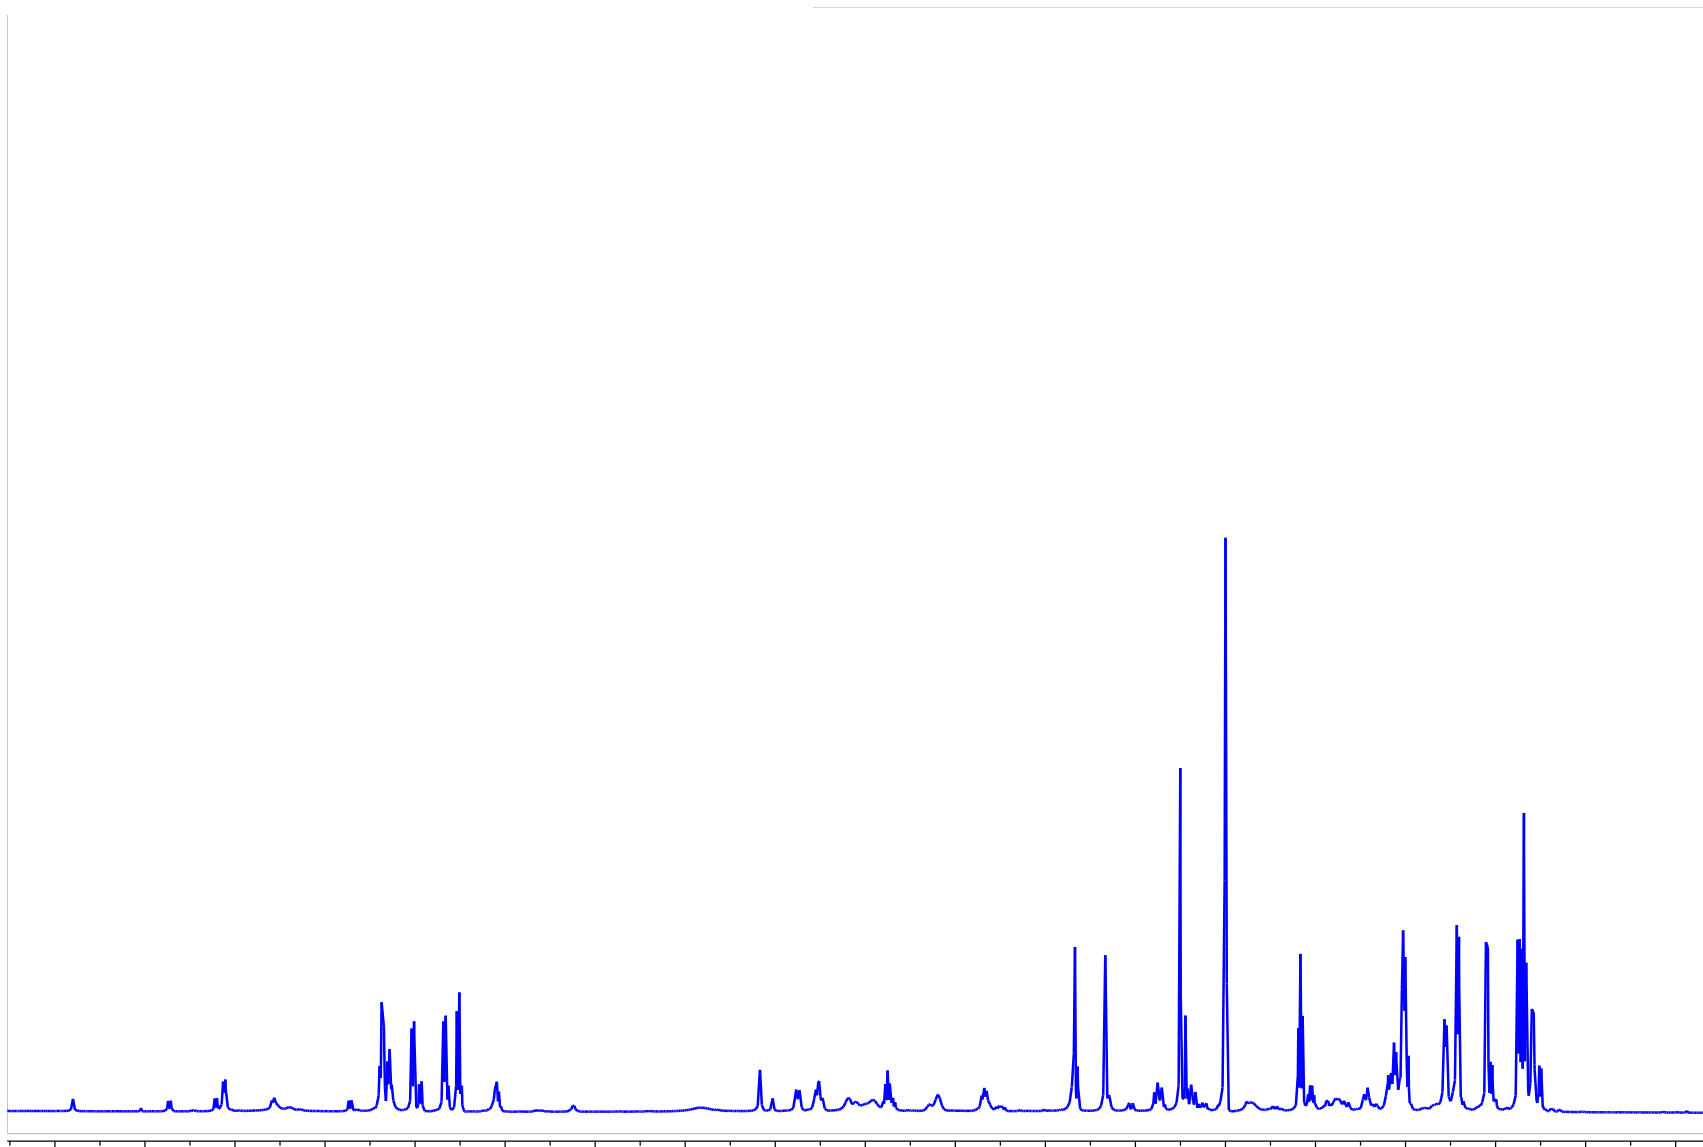

COSY Spectrum of Molassamide (4) in DMSO- $d_6$ , 600 MHz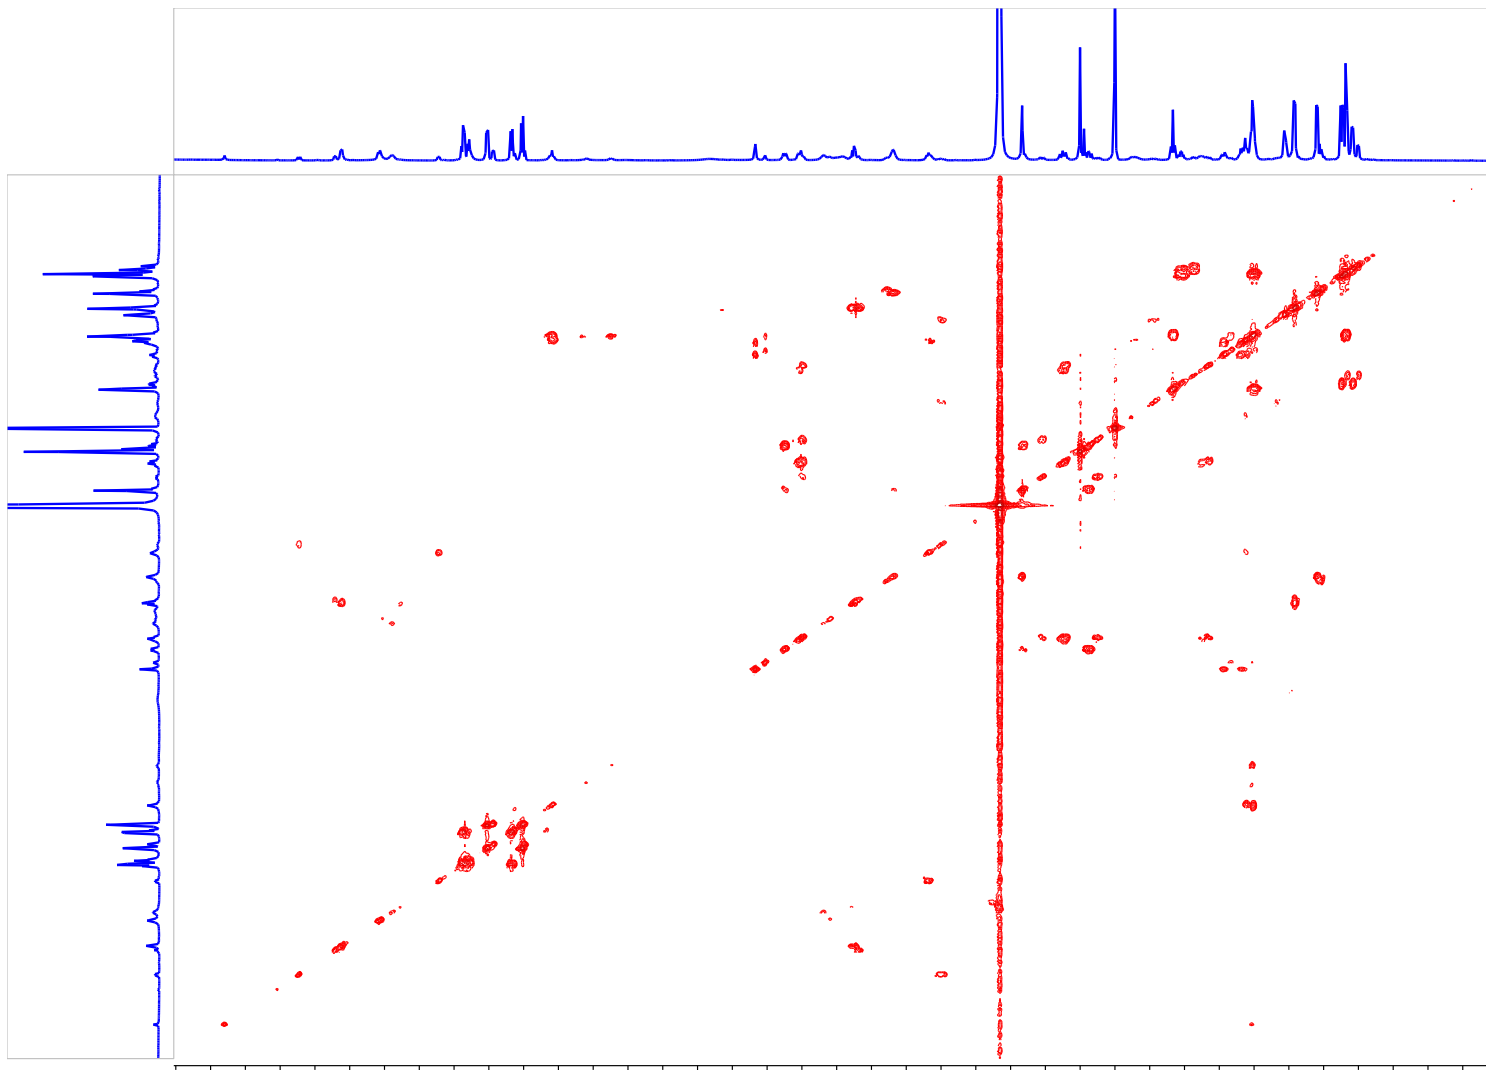

HSQC Spectrum of Molassamide (4) in DMSO- $d_6$ , 600 MHz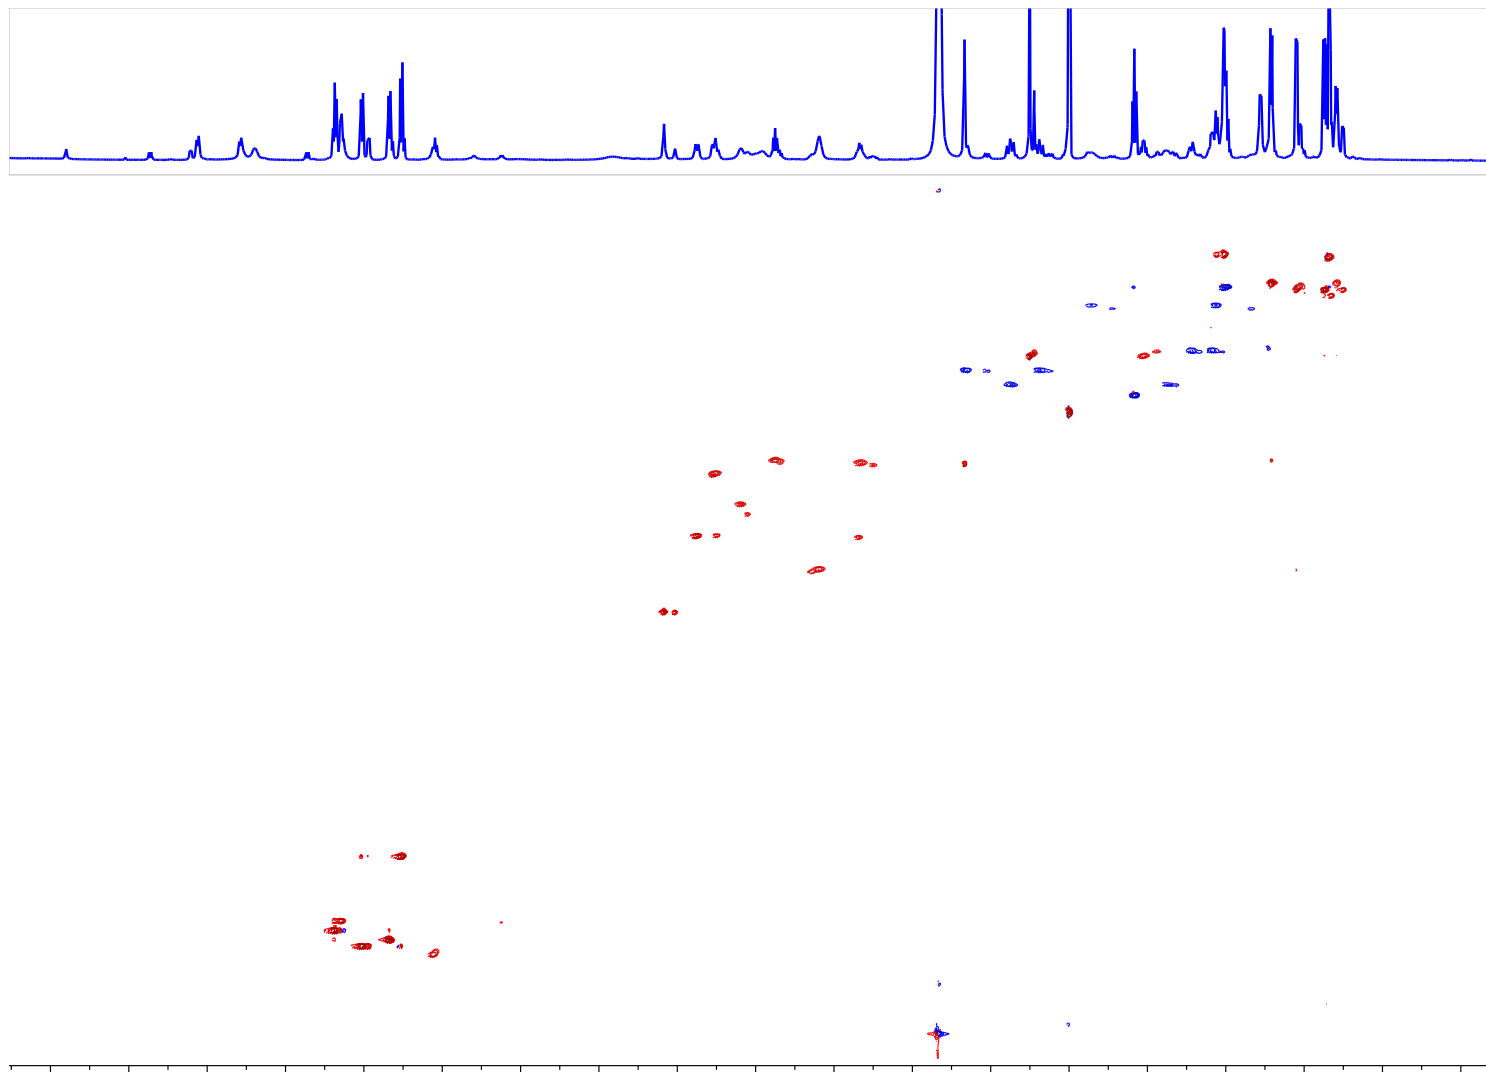

HMBC Spectrum of Molassamide (4) in DMSO-*d*<sub>6</sub>, 600 MHz

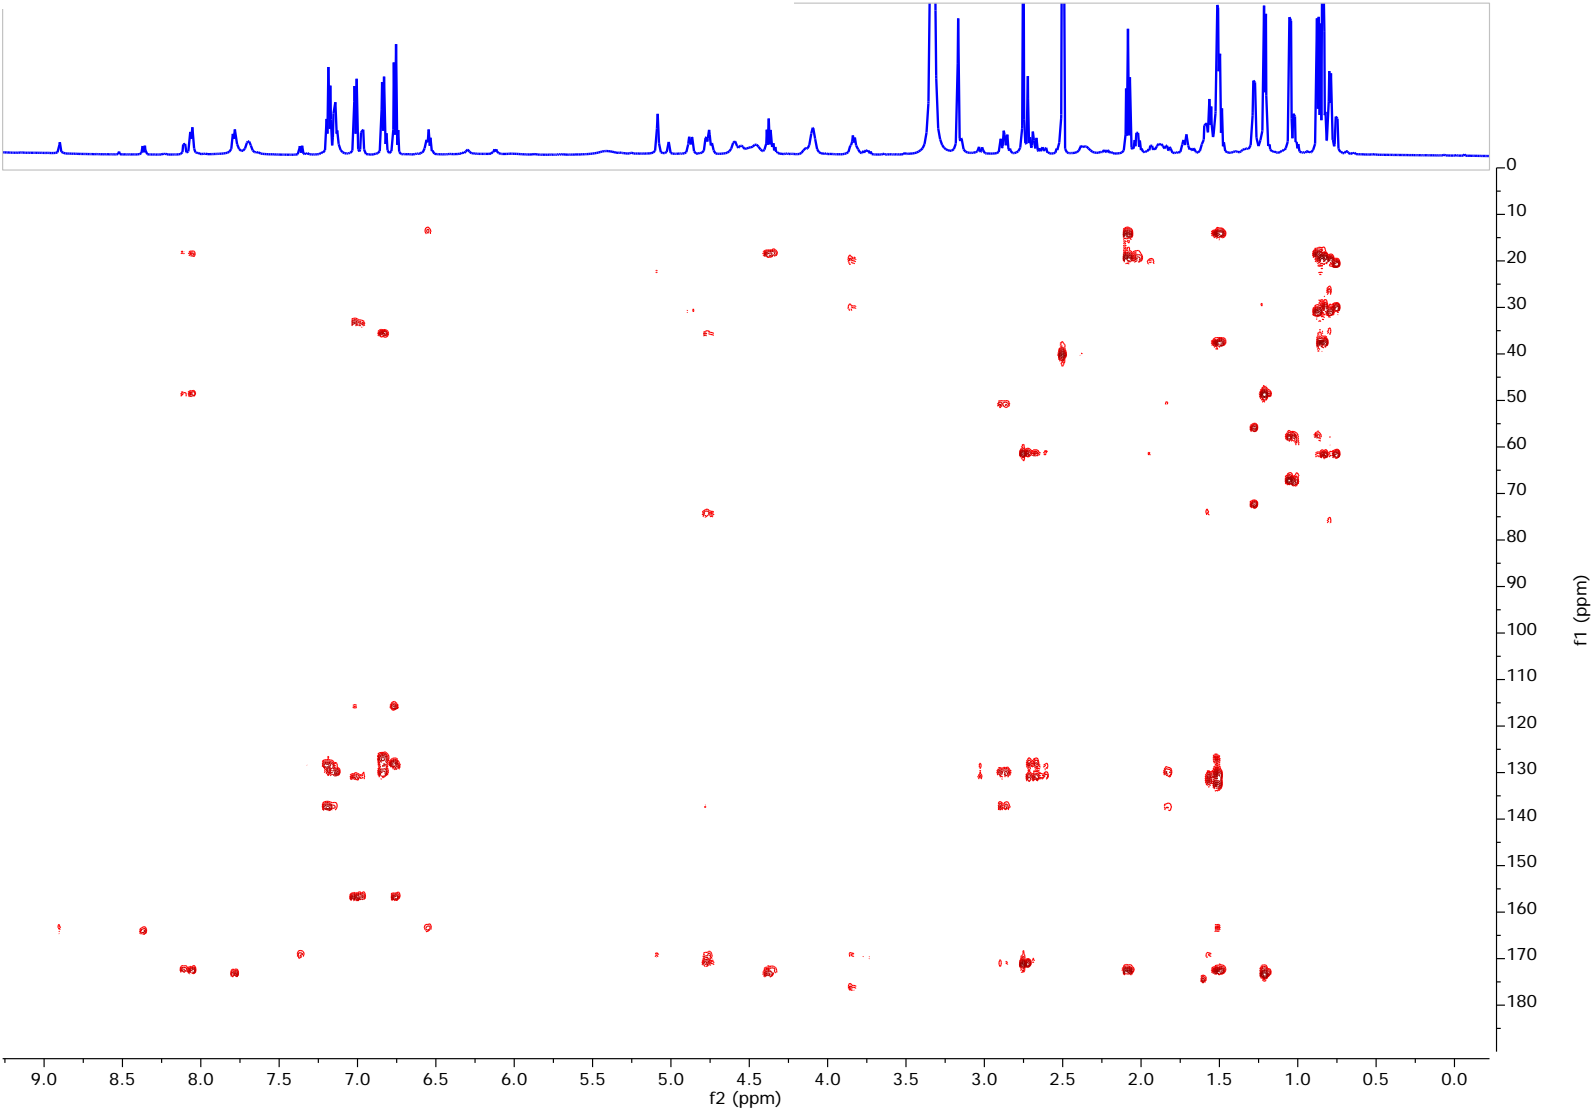

ROESY Spectrum of Molassamide (4) in DMSO-*d*<sub>6</sub>, 600 MHz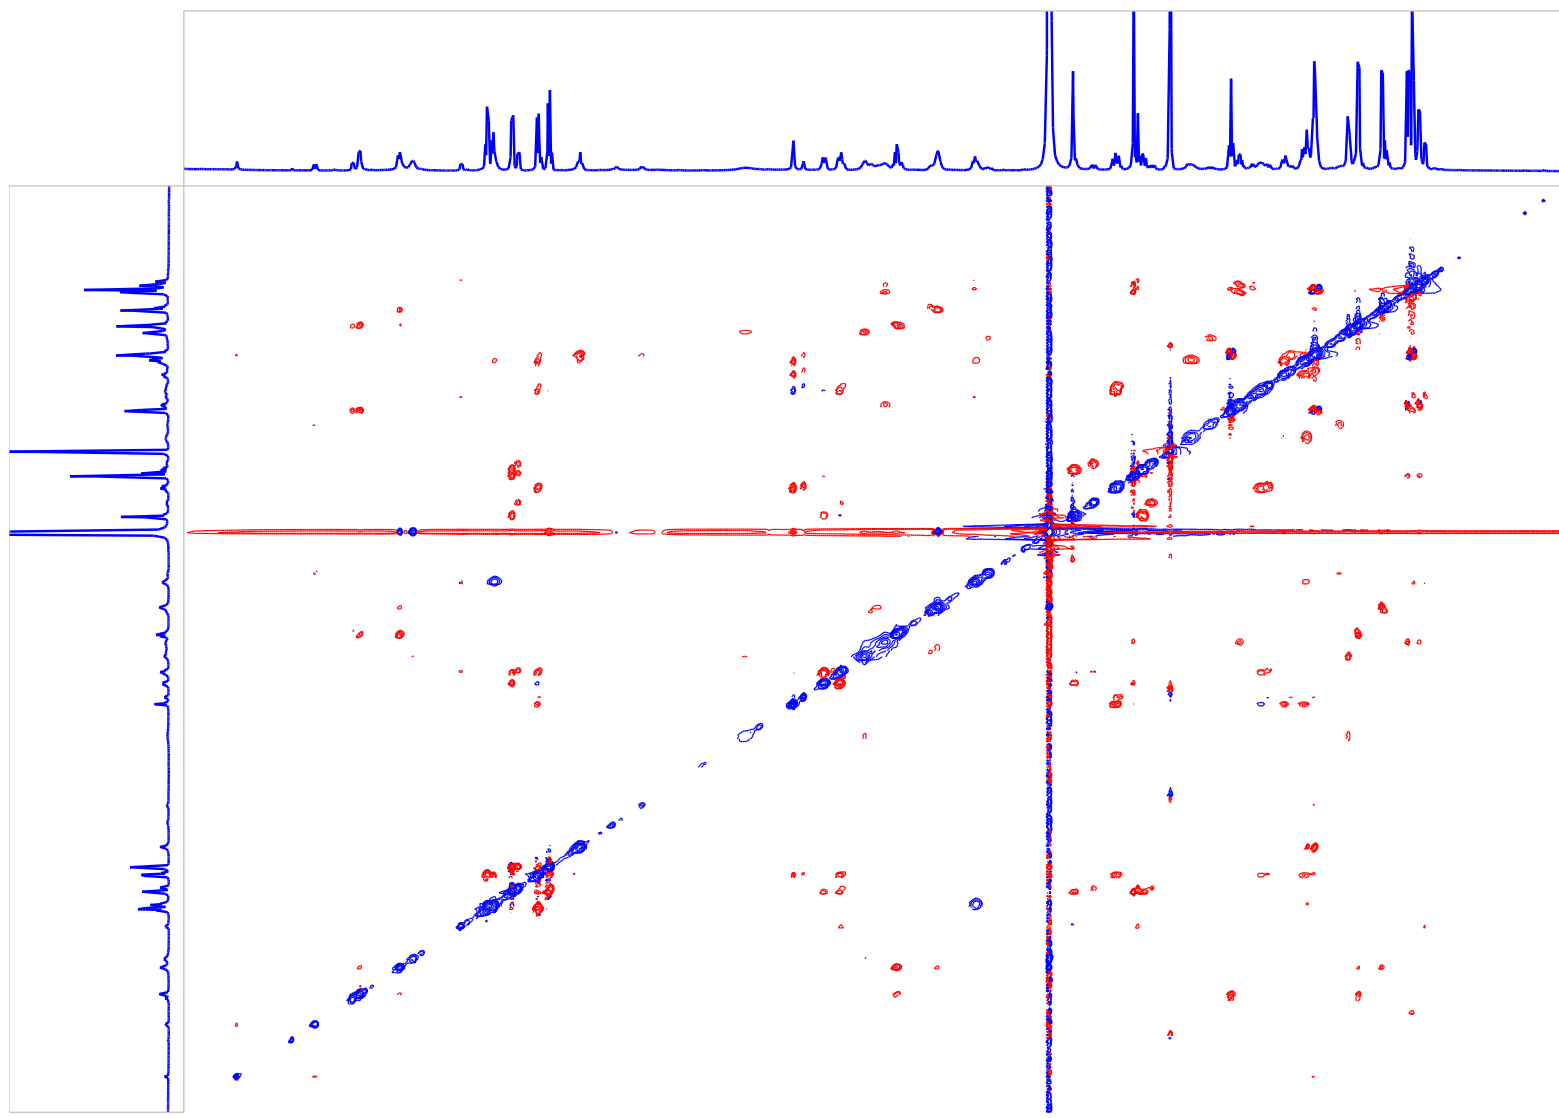

Supplement: NIHMS1516356-supplement-Supporting_Information.pdf [file NIHMS1516356-supplement-Supporting_Information.pdf]
